# Supplementary material for: Regional excess mortality during the 2020 COVID-19 pandemic in five European countries
Source: PubMed Central journal article supplement (PMC8789777; doi:10.1038/s41467-022-28157-3), 2022-01-25

1 Online Supplement of "Regional excess mortality during the 2020  
2 COVID-19 pandemic in five European countries"

3 Garyfallos Konstantinoudis<sup>1,\*</sup>, Michela Cameletti<sup>2</sup>, Virgilio Gómez-Rubio<sup>3</sup>, Inmaculada León  
4 Gómez<sup>4,5</sup>, Monica Pirani<sup>1</sup>, Gianluca Baio<sup>6</sup>, Amparo Larrauri<sup>4,5</sup>, Julien Riou<sup>7</sup>, Matthias  
5 Egger<sup>7, 8</sup>, Paolo Vineis<sup>1</sup>, and Marta Blangiardo<sup>1</sup>

6 <sup>1</sup>MRC Centre for Environment and Health, Department of Epidemiology and Biostatistics,  
7 School of Public Health, Imperial College London, London, UK

8 <sup>2</sup>Department of Economics, University of Bergamo, Bergamo, Italy

9 <sup>3</sup>Departamento de Matemáticas, Escuela Técnica Superior de Ingenieros Industriales,  
10 Universidad de Castilla-La Mancha, Albacete, Spain

11 <sup>4</sup>National Centre of Epidemiology (CNE), Institute of Health Carlos III, Madrid, Spain

12 <sup>5</sup>Consortium for Biomedical Research in Epidemiology and Public Health (CIBERESP),  
13 Institute of Health Carlos III, Madrid, Spain

14 <sup>6</sup>Department of Statistical Sciences, University College London, UK

15 <sup>7</sup>Institute of Social and Preventive Medicine, University of Bern, Bern, Switzerland

16 <sup>8</sup>Population Health Sciences, Bristol Medical School, University of Bristol, Bristol, UK

17 \*Corresponding author, email: [g.konstantinoudis@imperial.ac.uk](mailto:g.konstantinoudis@imperial.ac.uk)

## 18 List of Supplementary Tables

|    |   |                                                                                                    |    |
|----|---|----------------------------------------------------------------------------------------------------|----|
| 19 | 1 | Cross-validation results: correlation between predicted and observed number of deaths, and 95%     |    |
| 20 |   | coverage probability across the different countries and age and sex groups. . . . .                | 6  |
| 21 | 2 | Median relative excess deaths and 95% credible intervals in 2020 per NUTS2 regions in England.     | 7  |
| 22 | 3 | Median relative excess deaths and 95% credible intervals in 2020 per NUTS2 regions in Greece. .    | 8  |
| 23 | 4 | Median relative excess deaths and 95% credible intervals in 2020 per NUTS2 regions in Italy. . .   | 9  |
| 24 | 5 | Median relative excess deaths and 95% credible intervals in 2020 per NUTS2 regions in Spain. . .   | 10 |
| 25 | 6 | Median relative excess deaths and 95% credible intervals in 2020 per NUTS2 regions in Switzerland. | 11 |
| 26 | 7 | Frequency of population by age and sex groups in England, Greece, Italy, Spain and Switzerland     |    |
| 27 |   | in 2019. . . . .                                                                                   | 12 |
| 28 | 8 | Data sources for deaths and population across the different countries. . . . .                     | 13 |

## 29 List of Supplementary Figures

|    |   |                                                                                                    |    |
|----|---|----------------------------------------------------------------------------------------------------|----|
| 30 | 1 | NUTS2 (black) and NUTS3 (grey) region borders in England, Greece, Italy, Spain and Switzerland.    | 14 |
| 31 | 2 | Relative mortality risk of the effect of temperature during 2015 and 2020 by age and sex groups    |    |
| 32 |   | in England. . . . .                                                                                | 15 |
| 33 | 3 | Relative mortality risk of the effect of temperature during 2015 and 2020 by age and sex groups    |    |
| 34 |   | in Greece. . . . .                                                                                 | 16 |
| 35 | 4 | Relative mortality risk of the effect of temperature during 2015 and 2020 by age and sex groups    |    |
| 36 |   | in Italy. . . . .                                                                                  | 17 |
| 37 | 5 | Relative mortality risk of the effect of temperature during 2015 and 2020 by age and sex groups    |    |
| 38 |   | in Spain. . . . .                                                                                  | 18 |
| 39 | 6 | Relative mortality risk of the effect of temperature during 2015 and 2020 by age and sex groups    |    |
| 40 |   | in Switzerland. . . . .                                                                            | 19 |
| 41 | 7 | Weekly trends for all-cause total number of deaths by gender and age in England. The blue curve    |    |
| 42 |   | represents the posterior mean predicted from the 2015–2019 model, while the shaded blue ribbon     |    |
| 43 |   | describes the posterior 95% interval. The black line shows the observed number of deaths for 2020. | 20 |
| 44 | 8 | Weekly trends for all-cause total number of deaths by gender and age in Greece. The blue curve     |    |
| 45 |   | represents the posterior mean predicted from the 2015–2019 model, while the shaded blue ribbon     |    |
| 46 |   | describes the posterior 95% interval. The black line shows the observed number of deaths for 2020. | 21 |

|    |    |                                                                                                    |    |
|----|----|----------------------------------------------------------------------------------------------------|----|
| 47 | 9  | Weekly trends for all-cause total number of deaths by gender and age in Italy. The blue curve      |    |
| 48 |    | represents the posterior mean predicted from the 2015–2019 model, while the shaded blue ribbon     |    |
| 49 |    | describes the posterior 95% interval. The black line shows the observed number of deaths for 2020. | 22 |
| 50 | 10 | Weekly trends for all-cause total number of deaths by gender and age in Spain. The blue curve      |    |
| 51 |    | represents the posterior mean predicted from the 2015–2019 model, while the shaded blue ribbon     |    |
| 52 |    | describes the posterior 95% interval. The black line shows the observed number of deaths for 2020. | 23 |
| 53 | 11 | Weekly trends for all-cause total number of deaths by gender and age in Switzerland. The blue      |    |
| 54 |    | curve represents the posterior mean predicted from the 2015–2019 model, while the shaded blue      |    |
| 55 |    | ribbon describes the posterior 95% interval. The black line shows the observed number of deaths    |    |
| 56 |    | for 2020. . . . .                                                                                  | 24 |
| 57 | 12 | Relative excess mortality during 2020 by NUTS3 regions in England stratified by age and sex. . .   | 25 |
| 58 | 13 | Posterior probability that the relative excess mortality is larger than zero during 2020 by NUTS3  |    |
| 59 |    | regions in England stratified by age and sex. . . . .                                              | 26 |
| 60 | 14 | Relative excess mortality during 2020 by NUTS3 regions in Greece stratified by age and sex. . .    | 27 |
| 61 | 15 | Posterior probability that the relative excess mortality is larger than zero during 2020 by NUTS3  |    |
| 62 |    | regions in Greece stratified by age and sex. . . . .                                               | 28 |
| 63 | 16 | Relative excess mortality during 2020 by NUTS3 regions in Italy stratified by age and sex. . . .   | 29 |
| 64 | 17 | Posterior probability that the relative excess mortality is larger than zero during 2020 by NUTS3  |    |
| 65 |    | regions in Italy stratified by age and sex. . . . .                                                | 30 |
| 66 | 18 | Relative excess mortality during 2020 by NUTS3 regions in Spain stratified by age and sex. . . .   | 31 |
| 67 | 19 | Posterior probability that the relative excess mortality is larger than zero during 2020 by NUTS3  |    |
| 68 |    | regions in Spain stratified by age and sex. . . . .                                                | 32 |
| 69 | 20 | Relative excess mortality during 2020 by NUTS3 regions in Switzerland stratified by age and sex.   | 33 |
| 70 | 21 | Posterior probability that the relative excess mortality is larger than zero during 2020 by NUTS3  |    |
| 71 |    | regions in Switzerland stratified by age and sex. . . . .                                          | 34 |
| 72 | 22 | Relative excess mortality during January-June 2020 by NUTS3 regions in England stratified by       |    |
| 73 |    | age and sex. . . . .                                                                               | 35 |
| 74 | 23 | Relative excess mortality during July-December 2020 by NUTS3 regions in England stratified by      |    |
| 75 |    | age and sex. . . . .                                                                               | 36 |
| 76 | 24 | Posterior probability that the relative excess mortality is larger than zero during January-June   |    |
| 77 |    | 2020 by NUTS3 regions in England stratified by age and sex. . . . .                                | 37 |

|     |    |                                                                                                   |    |
|-----|----|---------------------------------------------------------------------------------------------------|----|
| 78  | 25 | Posterior probability that the relative excess mortality is larger than zero during July-December |    |
| 79  |    | 2020 by NUTS3 regions in England stratified by age and sex. . . . .                               | 38 |
| 80  | 26 | Relative excess mortality during January-June 2020 by NUTS3 regions in Greece stratified by age   |    |
| 81  |    | and sex. . . . .                                                                                  | 39 |
| 82  | 27 | Relative excess mortality during July-December 2020 by NUTS3 regions in Greece stratified by      |    |
| 83  |    | age and sex. . . . .                                                                              | 40 |
| 84  | 28 | Posterior probability that the relative excess mortality is larger than zero during January-June  |    |
| 85  |    | 2020 by NUTS3 regions in Greece stratified by age and sex. . . . .                                | 41 |
| 86  | 29 | Posterior probability that the relative excess mortality is larger than zero during July-December |    |
| 87  |    | 2020 by NUTS3 regions in Greece stratified by age and sex. . . . .                                | 42 |
| 88  | 30 | Relative excess mortality during January-June 2020 by NUTS3 regions in Italy stratified by age    |    |
| 89  |    | and sex. . . . .                                                                                  | 43 |
| 90  | 31 | Relative excess mortality during July-December 2020 by NUTS3 regions in Italy stratified by age   |    |
| 91  |    | and sex. . . . .                                                                                  | 44 |
| 92  | 32 | Posterior probability that the relative excess mortality is larger than zero during January-June  |    |
| 93  |    | 2020 by NUTS3 regions in Italy stratified by age and sex. . . . .                                 | 45 |
| 94  | 33 | Posterior probability that the relative excess mortality is larger than zero during July-December |    |
| 95  |    | 2020 by NUTS3 regions in Italy stratified by age and sex. . . . .                                 | 46 |
| 96  | 34 | Relative excess mortality during January-June 2020 by NUTS3 regions in Spain stratified by age    |    |
| 97  |    | and sex. . . . .                                                                                  | 47 |
| 98  | 35 | Relative excess mortality during July-December 2020 by NUTS3 regions in Spain stratified by age   |    |
| 99  |    | and sex. . . . .                                                                                  | 48 |
| 100 | 36 | Posterior probability that the relative excess mortality is larger than zero during January-June  |    |
| 101 |    | 2020 by NUTS3 regions in Spain stratified by age and sex. . . . .                                 | 49 |
| 102 | 37 | Posterior probability that the relative excess mortality is larger than zero during July-December |    |
| 103 |    | 2020 by NUTS3 regions in Spain stratified by age and sex. . . . .                                 | 50 |
| 104 | 38 | Relative excess mortality during January-June 2020 by NUTS3 regions in Switzerland stratified     |    |
| 105 |    | by age and sex. . . . .                                                                           | 51 |
| 106 | 39 | Relative excess mortality during July-December 2020 by NUTS3 regions in Switzerland stratified    |    |
| 107 |    | by age and sex. . . . .                                                                           | 52 |



|     |    |                                                                                                   |    |
|-----|----|---------------------------------------------------------------------------------------------------|----|
| 108 | 40 | Posterior probability that the relative excess mortality is larger than zero during January-June  |    |
| 109 |    | 2020 by NUTS3 regions in Switzerland stratified by age and sex. . . . .                           | 53 |
| 110 | 41 | Posterior probability that the relative excess mortality is larger than zero during July-December |    |
| 111 |    | 2020 by NUTS3 regions in Switzerland stratified by age and sex. . . . .                           | 54 |

Supplementary Table 1: Cross-validation results: correlation between predicted and observed number of deaths, and 95% coverage probability across the different countries and age and sex groups.

| Males        |                   |          |                   |          |                   |          |                   |          |                   |          |
|--------------|-------------------|----------|-------------------|----------|-------------------|----------|-------------------|----------|-------------------|----------|
| Age group    | England           |          | Greece            |          | Italy             |          | Spain             |          | Switzerland       |          |
|              | Correlation       | Coverage | Correlation       | Coverage | Correlation       | Coverage | Correlation       | Coverage | Correlation       | Coverage |
| < 40         | 0.23 (0.21, 0.24) | 0.94     | 0.56 (0.57, 0.62) | 0.92     | 0.51 (0.50, 0.52) | 0.94     | 0.69 (0.68, 0.70) | 0.93     | 0.41 (0.38, 0.44) | 0.93     |
| 40-59        | 0.45 (0.44, 0.46) | 0.95     | 0.87 (0.86, 0.87) | 0.94     | 0.83 (0.83, 0.84) | 0.95     | 0.90 (0.90, 0.91) | 0.94     | 0.69 (0.67, 0.71) | 0.94     |
| 60-69        | 0.55 (0.54, 0.55) | 0.95     | 0.90 (0.89, 0.90) | 0.95     | 0.87 (0.85, 0.88) | 0.95     | 0.92 (0.92, 0.93) | 0.94     | 0.74 (0.72, 0.76) | 0.94     |
| 70-79        | 0.70 (0.69, 0.71) | 0.95     | 0.93 (0.92, 0.93) | 0.95     | 0.93 (0.91, 0.93) | 0.95     | 0.95 (0.94, 0.95) | 0.93     | 0.84 (0.83, 0.85) | 0.95     |
| <i>geq80</i> | 0.83 (0.82, 0.84) | 0.94     | 0.96 (0.95, 0.96) | 0.95     | 0.95 (0.94, 0.95) | 0.93     | 0.97 (0.97, 0.97) | 0.91     | 0.92 (0.91, 0.93) | 0.95     |
| Females      |                   |          |                   |          |                   |          |                   |          |                   |          |
| 40 <         | 0.15 (0.14, 0.16) | 0.93     | 0.43 (0.40, 0.46) | 0.88     | 0.38 (0.37, 0.40) | 0.92     | 0.58 (0.56, 0.59) | 0.92     | 0.28 (0.26, 0.31) | 0.89     |
| 40-59        | 0.35 (0.34, 0.36) | 0.95     | 0.81 (0.79, 0.81) | 0.93     | 0.78 (0.77, 0.79) | 0.95     | 0.86 (0.85, 0.86) | 0.94     | 0.57 (0.55, 0.59) | 0.93     |
| 60-69        | 0.46 (0.45, 0.47) | 0.95     | 0.86 (0.85, 0.86) | 0.94     | 0.83 (0.82, 0.83) | 0.95     | 0.88 (0.87, 0.88) | 0.95     | 0.64 (0.63, 0.66) | 0.94     |
| 70-79        | 0.65 (0.63, 0.65) | 0.95     | 0.92 (0.91, 0.92) | 0.95     | 0.91 (0.90, 0.92) | 0.95     | 0.92 (0.91, 0.93) | 0.94     | 0.81 (0.80, 0.82) | 0.94     |
| <i>geq80</i> | 0.87 (0.82, 0.84) | 0.94     | 0.97 (0.96, 0.97) | 0.94     | 0.96 (0.95, 0.96) | 0.92     | 0.97 (0.97, 0.98) | 0.90     | 0.94 (0.93, 0.95) | 0.94     |

Supplementary Table 2: Median relative excess deaths and 95% credible intervals in 2020 per NUTS2 regions in England.

| Region                                           | Males               | Females             |
|--------------------------------------------------|---------------------|---------------------|
| Outer London - West and North West               | 0.21 (0.15, 0.28)   | 0.12 (0.05, 0.28)   |
| Outer London - East and North East               | 0.20 (0.14, 0.26)   | 0.15 (0.07, 0.26)   |
| West Midlands                                    | 0.19 (0.13, 0.25)   | 0.14 (0.06, 0.25)   |
| Inner London - East                              | 0.19 (0.13, 0.26)   | 0.15 (0.08, 0.26)   |
| Outer London - South                             | 0.16 (0.10, 0.24)   | 0.08 (-0.00, 0.24)  |
| South Yorkshire                                  | 0.16 (0.10, 0.22)   | 0.12 (0.05, 0.22)   |
| Lancashire                                       | 0.15 (0.09, 0.21)   | 0.08 (0.01, 0.21)   |
| Greater Manchester                               | 0.14 (0.09, 0.20)   | 0.09 (0.02, 0.20)   |
| West Yorkshire                                   | 0.14 (0.08, 0.20)   | 0.08 (0.01, 0.20)   |
| Kent                                             | 0.14 (0.07, 0.20)   | 0.08 (0.01, 0.20)   |
| Merseyside                                       | 0.13 (0.07, 0.19)   | 0.10 (0.02, 0.19)   |
| Leicestershire, Rutland and Northamptonshire     | 0.13 (0.07, 0.19)   | 0.07 (-0.01, 0.19)  |
| Bedfordshire and Hertfordshire                   | 0.12 (0.06, 0.18)   | 0.08 (0.00, 0.18)   |
| Shropshire and Staffordshire                     | 0.11 (0.06, 0.18)   | 0.07 (0.00, 0.18)   |
| Tees Valley and Durham                           | 0.11 (0.05, 0.17)   | 0.09 (0.00, 0.17)   |
| Essex                                            | 0.11 (0.05, 0.17)   | 0.03 (-0.04, 0.17)  |
| Cumbria                                          | 0.10 (0.03, 0.17)   | 0.06 (-0.02, 0.17)  |
| Herefordshire, Worcestershire and Warwickshire   | 0.10 (0.04, 0.16)   | 0.07 (-0.00, 0.16)  |
| East Yorkshire and Northern Lincolnshire         | 0.09 (0.03, 0.16)   | 0.04 (-0.03, 0.16)  |
| Inner London - West                              | 0.09 (0.03, 0.16)   | 0.02 (-0.06, 0.16)  |
| Derbyshire and Nottinghamshire                   | 0.09 (0.04, 0.15)   | 0.04 (-0.04, 0.15)  |
| Lincolnshire                                     | 0.09 (0.03, 0.16)   | 0.06 (-0.02, 0.16)  |
| Northumberland and Tyne and Wear                 | 0.08 (0.03, 0.14)   | 0.05 (-0.02, 0.14)  |
| Berkshire, Buckinghamshire and Oxfordshire       | 0.08 (0.02, 0.14)   | 0.06 (-0.02, 0.14)  |
| Surrey, East and West Sussex                     | 0.07 (0.01, 0.12)   | 0.05 (-0.03, 0.12)  |
| Cheshire                                         | 0.07 (0.01, 0.13)   | 0.06 (-0.02, 0.13)  |
| Gloucestershire, Wiltshire and Bath/Bristol area | 0.06 (0.01, 0.12)   | 0.04 (-0.03, 0.12)  |
| Hampshire and Isle of Wight                      | 0.04 (-0.01, 0.10)  | 0.02 (-0.05, 0.10)  |
| East Anglia                                      | 0.04 (-0.01, 0.09)  | 0.03 (-0.05, 0.09)  |
| North Yorkshire                                  | 0.04 (-0.02, 0.10)  | 0.03 (-0.05, 0.10)  |
| Dorset and Somerset                              | 0.02 (-0.03, 0.08)  | -0.00 (-0.08, 0.08) |
| Cornwall and Isles of Scilly                     | -0.02 (-0.08, 0.04) | -0.05 (-0.11, 0.04) |
| Devon                                            | -0.03 (-0.08, 0.03) | -0.05 (-0.12, 0.03) |
| England                                          | 0.11 (0.05, 0.16)   | 0.06 (-0.01, 0.16)  |

Supplementary Table 3: Median relative excess deaths and 95% credible intervals in 2020 per NUTS2 regions in Greece.

| Region                       | Males               | Females             |
|------------------------------|---------------------|---------------------|
| Eastern Macedonia and Thrace | 0.17 (0.09, 0.25)   | 0.14 (0.06, 0.25)   |
| Western Macedonia            | 0.16 (0.08, 0.27)   | 0.19 (0.08, 0.27)   |
| Central Macedonia            | 0.15 (0.08, 0.24)   | 0.13 (0.05, 0.24)   |
| Thessaly                     | 0.08 (0.01, 0.17)   | 0.09 (0.01, 0.17)   |
| Western Greece               | 0.05 (-0.02, 0.12)  | 0.01 (-0.07, 0.12)  |
| Ionian Islands               | 0.04 (-0.04, 0.13)  | 0.01 (-0.08, 0.13)  |
| Attica                       | 0.02 (-0.04, 0.09)  | 0.02 (-0.05, 0.09)  |
| Central Greece               | 0.02 (-0.05, 0.10)  | -0.00 (-0.08, 0.10) |
| Epirus                       | -0.00 (-0.08, 0.09) | 0.01 (-0.07, 0.09)  |
| Peloponnese                  | -0.00 (-0.07, 0.08) | 0.05 (-0.04, 0.08)  |
| Crete                        | -0.01 (-0.08, 0.06) | 0.02 (-0.06, 0.06)  |
| North Aegean                 | -0.01 (-0.10, 0.08) | 0.06 (-0.04, 0.08)  |
| South Aegean                 | -0.03 (-0.10, 0.05) | 0.02 (-0.06, 0.05)  |
| Greece                       | 0.06 (-0.01, 0.13)  | 0.06 (-0.02, 0.13)  |

Supplementary Table 4: Median relative excess deaths and 95% credible intervals in 2020 per NUTS2 regions in Italy.

| Region                | Males               | Females             |
|-----------------------|---------------------|---------------------|
| Lombardia             | 0.29 (0.20, 0.38)   | 0.25 (0.17, 0.38)   |
| Piemonte              | 0.18 (0.10, 0.27)   | 0.17 (0.08, 0.27)   |
| Trentino-Alto Adige   | 0.16 (0.08, 0.25)   | 0.20 (0.11, 0.25)   |
| Valle d'Aosta         | 0.15 (0.05, 0.28)   | 0.23 (0.10, 0.28)   |
| Liguria               | 0.15 (0.06, 0.23)   | 0.12 (0.04, 0.23)   |
| Emilia-Romagna        | 0.13 (0.04, 0.21)   | 0.12 (0.04, 0.21)   |
| Veneto                | 0.10 (0.02, 0.17)   | 0.11 (0.02, 0.17)   |
| Marche                | 0.07 (-0.01, 0.15)  | 0.08 (0.01, 0.15)   |
| Puglia                | 0.07 (-0.00, 0.14)  | 0.05 (-0.02, 0.14)  |
| Friuli Venezia Giulia | 0.06 (-0.02, 0.13)  | 0.08 (-0.00, 0.13)  |
| Sardegna              | 0.05 (-0.02, 0.12)  | 0.06 (-0.02, 0.12)  |
| Abruzzo               | 0.04 (-0.04, 0.11)  | 0.01 (-0.06, 0.11)  |
| Toscana               | 0.03 (-0.04, 0.11)  | 0.04 (-0.03, 0.11)  |
| Campania              | 0.03 (-0.03, 0.10)  | -0.00 (-0.07, 0.10) |
| Sicilia               | 0.02 (-0.05, 0.09)  | 0.02 (-0.05, 0.09)  |
| Basilicata            | 0.02 (-0.05, 0.10)  | 0.03 (-0.06, 0.10)  |
| Umbria                | 0.01 (-0.06, 0.09)  | 0.01 (-0.07, 0.09)  |
| Calabria              | 0.01 (-0.06, 0.08)  | 0.00 (-0.07, 0.08)  |
| Lazio                 | 0.00 (-0.07, 0.06)  | -0.02 (-0.09, 0.06) |
| Molise                | -0.00 (-0.08, 0.08) | 0.06 (-0.03, 0.08)  |
| Italy                 | 0.10 (0.03, 0.18)   | 0.09 (0.02, 0.18)   |

Supplementary Table 5: Median relative excess deaths and 95% credible intervals in 2020 per NUTS2 regions in Spain.

| Region                   | Males                | Females              |
|--------------------------|----------------------|----------------------|
| Madrid                   | 0.33 (0.27, 0.39)    | 0.28 (0.20, 0.35)    |
| Castile-la Mancha        | 0.32 (0.26, 0.38)    | 0.32 (0.23, 0.40)    |
| Castile-leon             | 0.28 (0.22, 0.34)    | 0.28 (0.20, 0.36)    |
| La Rioja                 | 0.18 (0.11, 0.28)    | 0.16 (0.06, 0.26)    |
| Catalonia                | 0.15 (0.09, 0.20)    | 0.18 (0.10, 0.25)    |
| Aragon                   | 0.15 (0.09, 0.21)    | 0.20 (0.12, 0.28)    |
| Extremadura              | 0.12 (0.06, 0.18)    | 0.15 (0.07, 0.23)    |
| Ceuta                    | 0.11 (-0.02, 0.30)   | 0.31 (0.14, 0.54)    |
| Navarre                  | 0.10 (0.04, 0.17)    | 0.15 (0.07, 0.23)    |
| Principality Of Asturias | 0.08 (0.03, 0.13)    | 0.10 (0.03, 0.16)    |
| Basque Community         | 0.07 (0.02, 0.12)    | 0.09 (0.02, 0.16)    |
| Region Of Murcia         | 0.04 (-0.01, 0.10)   | 0.02 (-0.04, 0.09)   |
| Cantabria                | 0.04 (-0.02, 0.10)   | 0.06 (-0.01, 0.14)   |
| Andalusia                | 0.03 (-0.01, 0.08)   | 0.04 (-0.02, 0.10)   |
| Valencian Community      | 0.03 (-0.02, 0.07)   | 0.02 (-0.04, 0.08)   |
| Melilla                  | -0.01 (-0.13, 0.16)  | 0.13 (-0.01, 0.30)   |
| Galicia                  | -0.02 (-0.06, 0.03)  | 0.01 (-0.06, 0.07)   |
| Canary Islands           | -0.08 (-0.12, -0.03) | -0.05 (-0.10, 0.01)  |
| Balearic Islands         | -0.08 (-0.13, -0.04) | -0.07 (-0.13, -0.01) |
| Spain                    | 0.12 (0.06, 0.19)    | 0.12 (0.06, 0.19)    |

Supplementary Table 6: Median relative excess deaths and 95% credible intervals in 2020 per NUTS2 regions in Switzerland.

| Region                   | Males              | Females            |
|--------------------------|--------------------|--------------------|
| Ticino                   | 0.20 (0.11, 0.32)  | 0.18 (0.09, 0.32)  |
| Lake Geneva region       | 0.16 (0.08, 0.25)  | 0.14 (0.07, 0.25)  |
| Eastern Switzerland      | 0.08 (0.00, 0.16)  | 0.07 (0.01, 0.16)  |
| Espace Mittelland        | 0.08 (0.00, 0.16)  | 0.05 (-0.01, 0.16) |
| Northwestern Switzerland | 0.06 (-0.01, 0.15) | 0.04 (-0.02, 0.15) |
| Central Switzerland      | 0.05 (-0.02, 0.13) | 0.01 (-0.05, 0.13) |
| Zurich                   | 0.02 (-0.06, 0.10) | 0.05 (-0.01, 0.10) |
| Switzerland              | 0.08 (0.01, 0.16)  | 0.07 (0.01, 0.16)  |

Supplementary Table 7: Frequency of population by age and sex groups in England, Greece, Italy, Spain and Switzerland in 2019.

| Age   | Sex    | England | Greece | Italy | Spain | Switzerland |
|-------|--------|---------|--------|-------|-------|-------------|
| 40<   | female | 0.25    | 0.23   | 0.19  | 0.21  | 0.23        |
| 40<   | male   | 0.25    | 0.23   | 0.20  | 0.22  | 0.24        |
| 40-59 | female | 0.13    | 0.15   | 0.16  | 0.16  | 0.14        |
| 40-59 | male   | 0.13    | 0.14   | 0.15  | 0.16  | 0.15        |
| 60-69 | female | 0.05    | 0.06   | 0.06  | 0.06  | 0.06        |
| 60-69 | male   | 0.05    | 0.06   | 0.06  | 0.05  | 0.05        |
| 70-79 | female | 0.04    | 0.05   | 0.05  | 0.04  | 0.04        |
| 70-79 | male   | 0.04    | 0.04   | 0.05  | 0.04  | 0.04        |
| 80+   | female | 0.03    | 0.02   | 0.05  | 0.04  | 0.03        |
| 80+   | male   | 0.02    | 0.02   | 0.03  | 0.02  | 0.02        |



Supplementary Table 8: Data sources for deaths and population across the different countries.

| country     | Deaths                                           | Population                           | Time point |
|-------------|--------------------------------------------------|--------------------------------------|------------|
| England     | Small Area Health Statistics Unit (SAHSU)        | Office for National Statistics (ONS) | 30-06      |
| Greece      | Hellenic Statistical Authority (ELSTAT)          | ELSTAT                               | 01-01      |
| Italy       | Italian National Institute of Statistics (ISTAT) | ISTAT                                | 01-01      |
| Spain       | National Statistics Institute (INE)              | INE                                  | 01-01      |
| Switzerland | Federal Statistical Office (BFS)                 | BFS                                  | 31-12      |

Supplementary Figure 1: NUTS2 (black) and NUTS3 (grey) region borders in England, Greece, Italy, Spain and Switzerland.

**England**

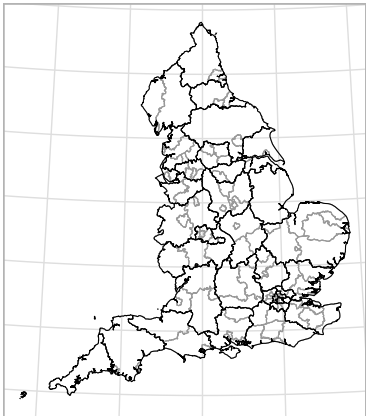

**Greece**

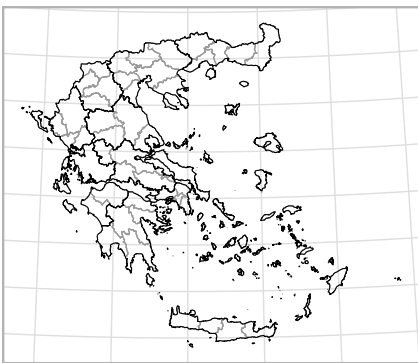

**Italy**

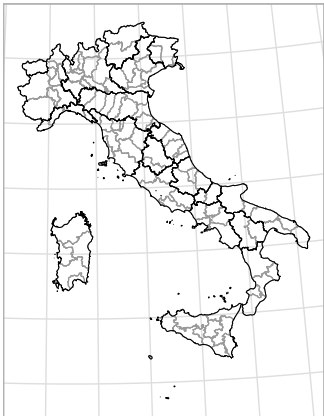

**Spain**

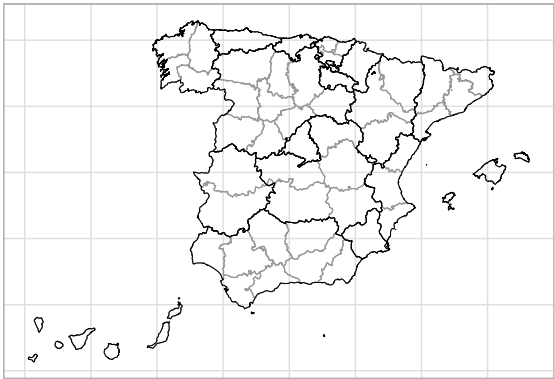

**Switzerland**

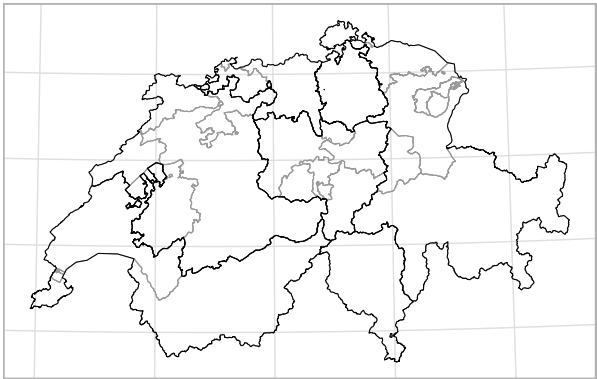

Supplementary Figure 2: Relative mortality risk of the effect of temperature during 2015 and 2020 by age and sex groups in England.

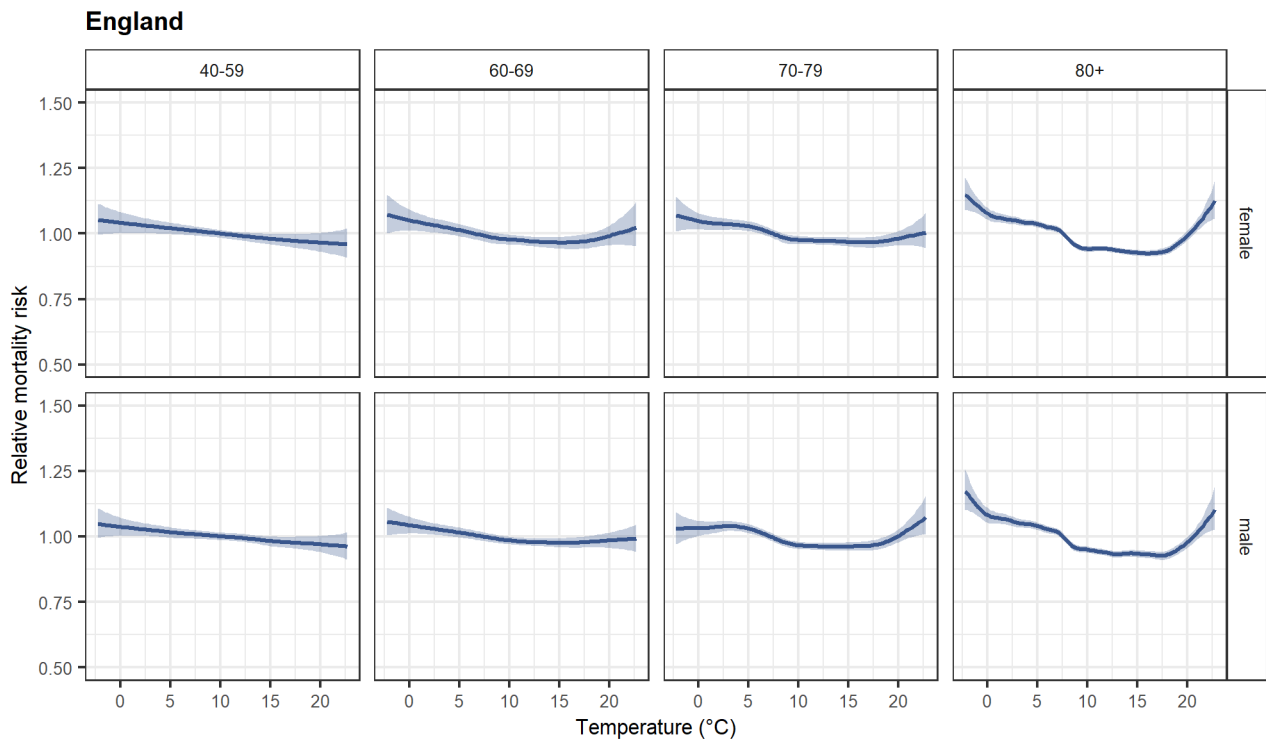

112 Data are presented as median relative mortality risk (the blue line) and 95% Credible Intervals (shaded blue  
113 areas).

Supplementary Figure 3: Relative mortality risk of the effect of temperature during 2015 and 2020 by age and sex groups in Greece.

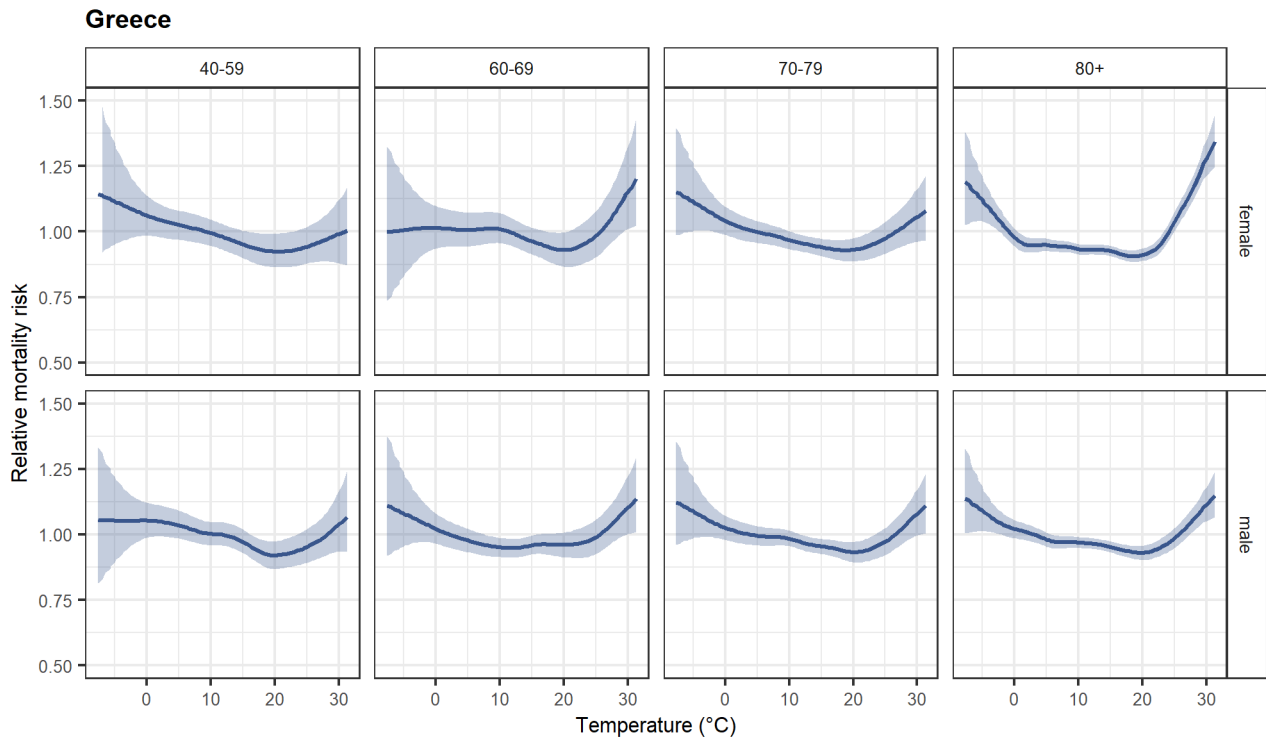

114 Data are presented as median relative mortality risk (the blue line) and 95% Credible Intervals (shaded blue  
115 areas).

Supplementary Figure 4: Relative mortality risk of the effect of temperature during 2015 and 2020 by age and sex groups in Italy.

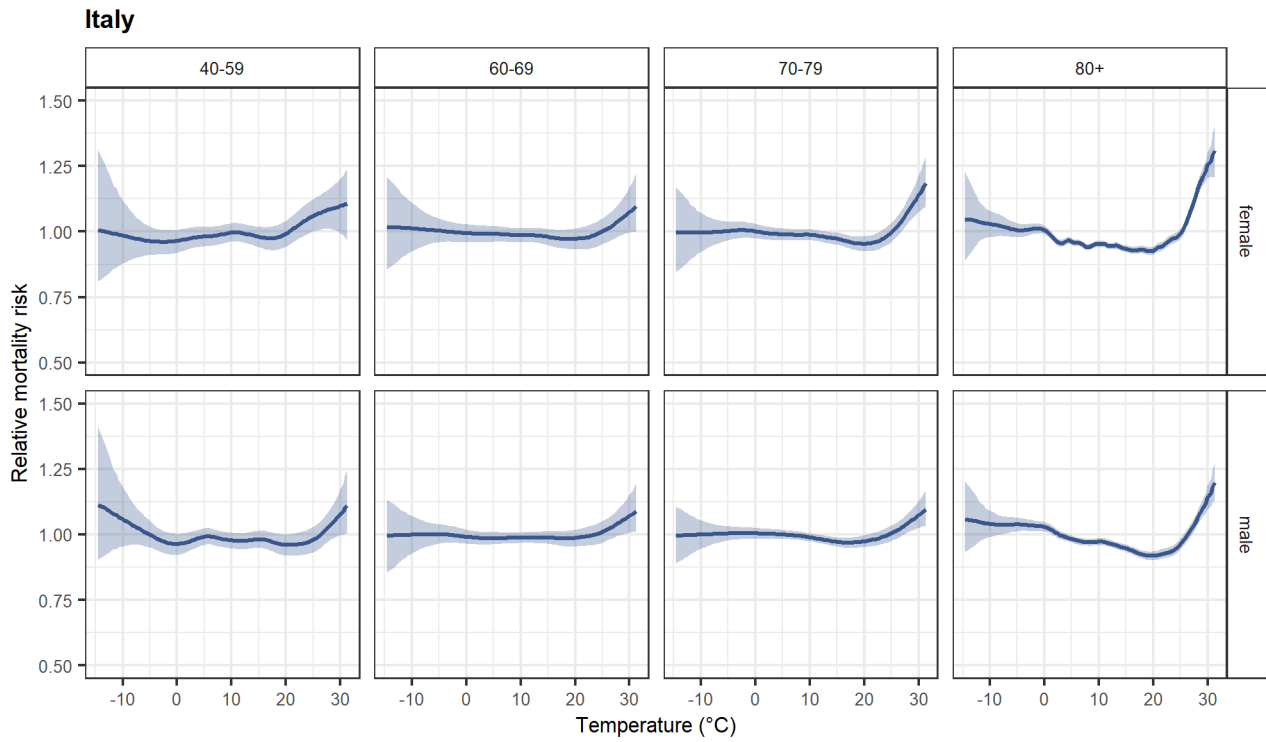

116 Data are presented as median relative mortality risk (the blue line) and 95% Credible Intervals (shaded blue  
117 areas).

Supplementary Figure 5: Relative mortality risk of the effect of temperature during 2015 and 2020 by age and sex groups in Spain.

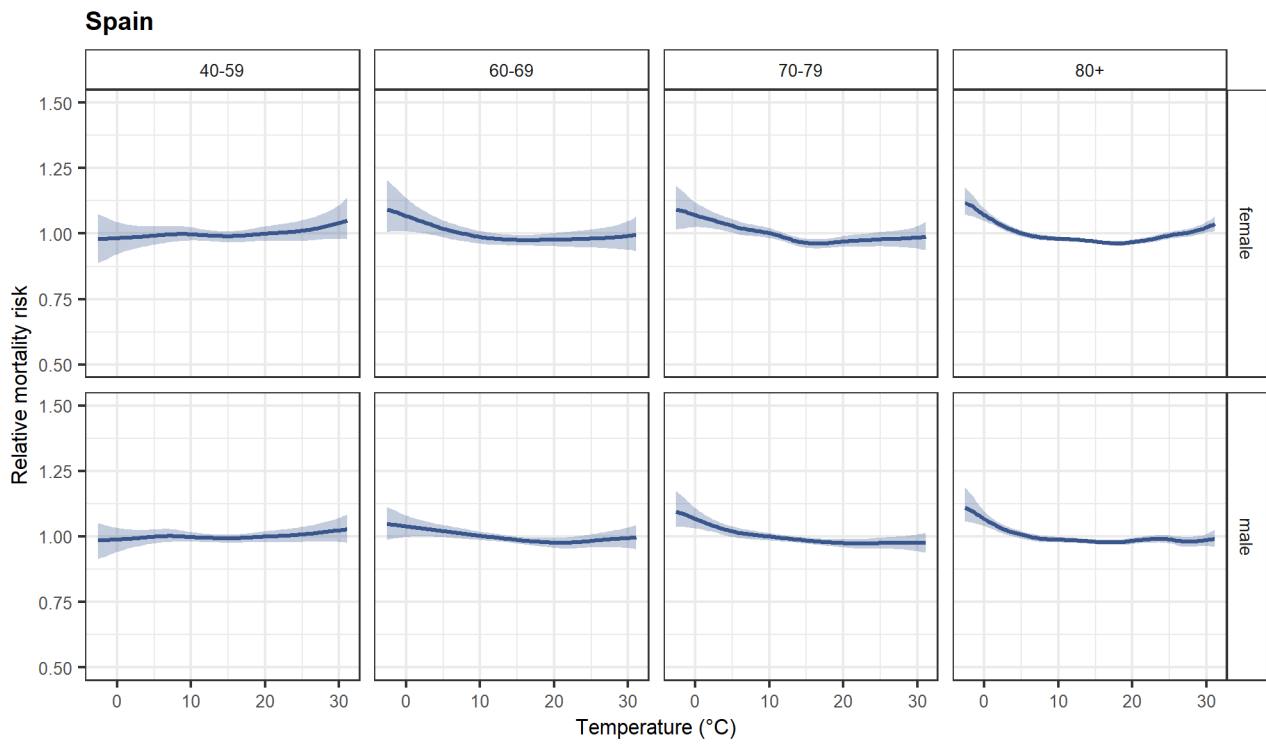

118 Data are presented as median relative mortality risk (the blue line) and 95% Credible Intervals (shaded blue  
119 areas).

Supplementary Figure 6: Relative mortality risk of the effect of temperature during 2015 and 2020 by age and sex groups in Switzerland.

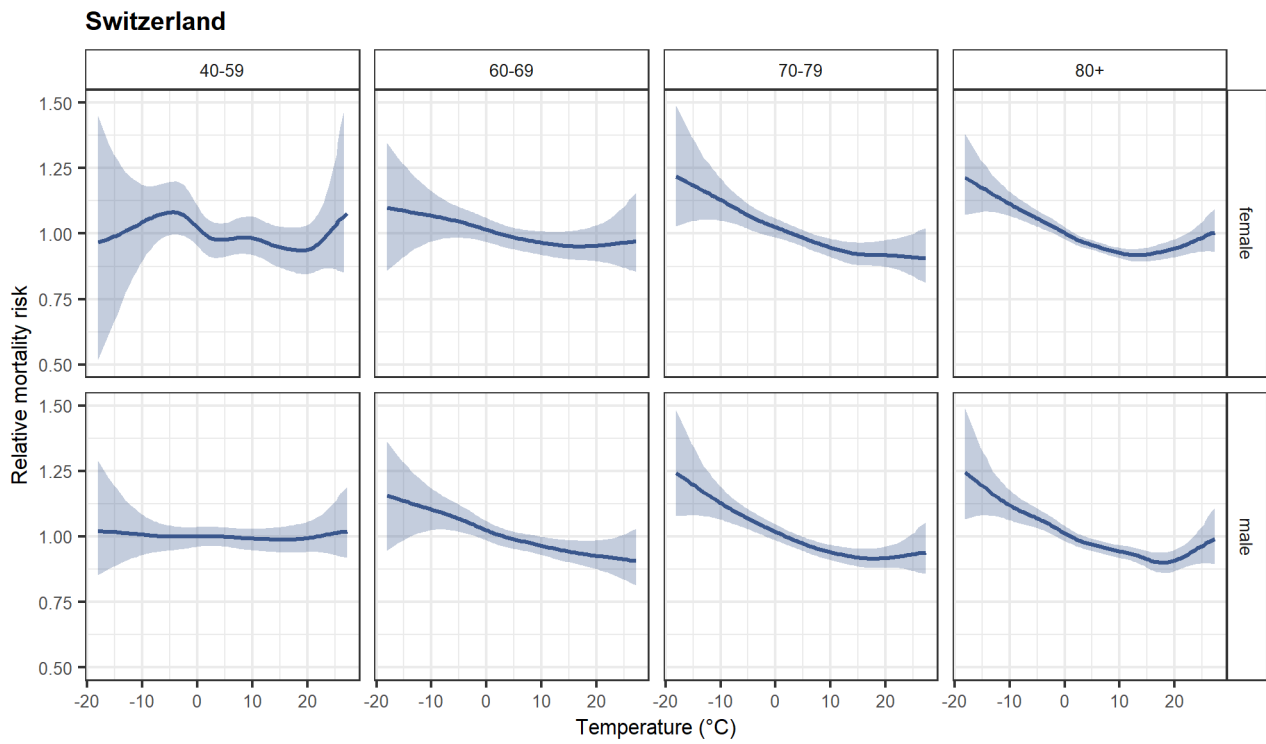

120 Data are presented as median relative mortality risk (the blue line) and 95% Credible Intervals (shaded blue  
121 areas).

Supplementary Figure 7: Weekly trends for all-cause total number of deaths by gender and age in England. The blue curve represents the posterior mean predicted from the 2015–2019 model, while the shaded blue ribbon describes the posterior 95% interval. The black line shows the observed number of deaths for 2020.

**England**

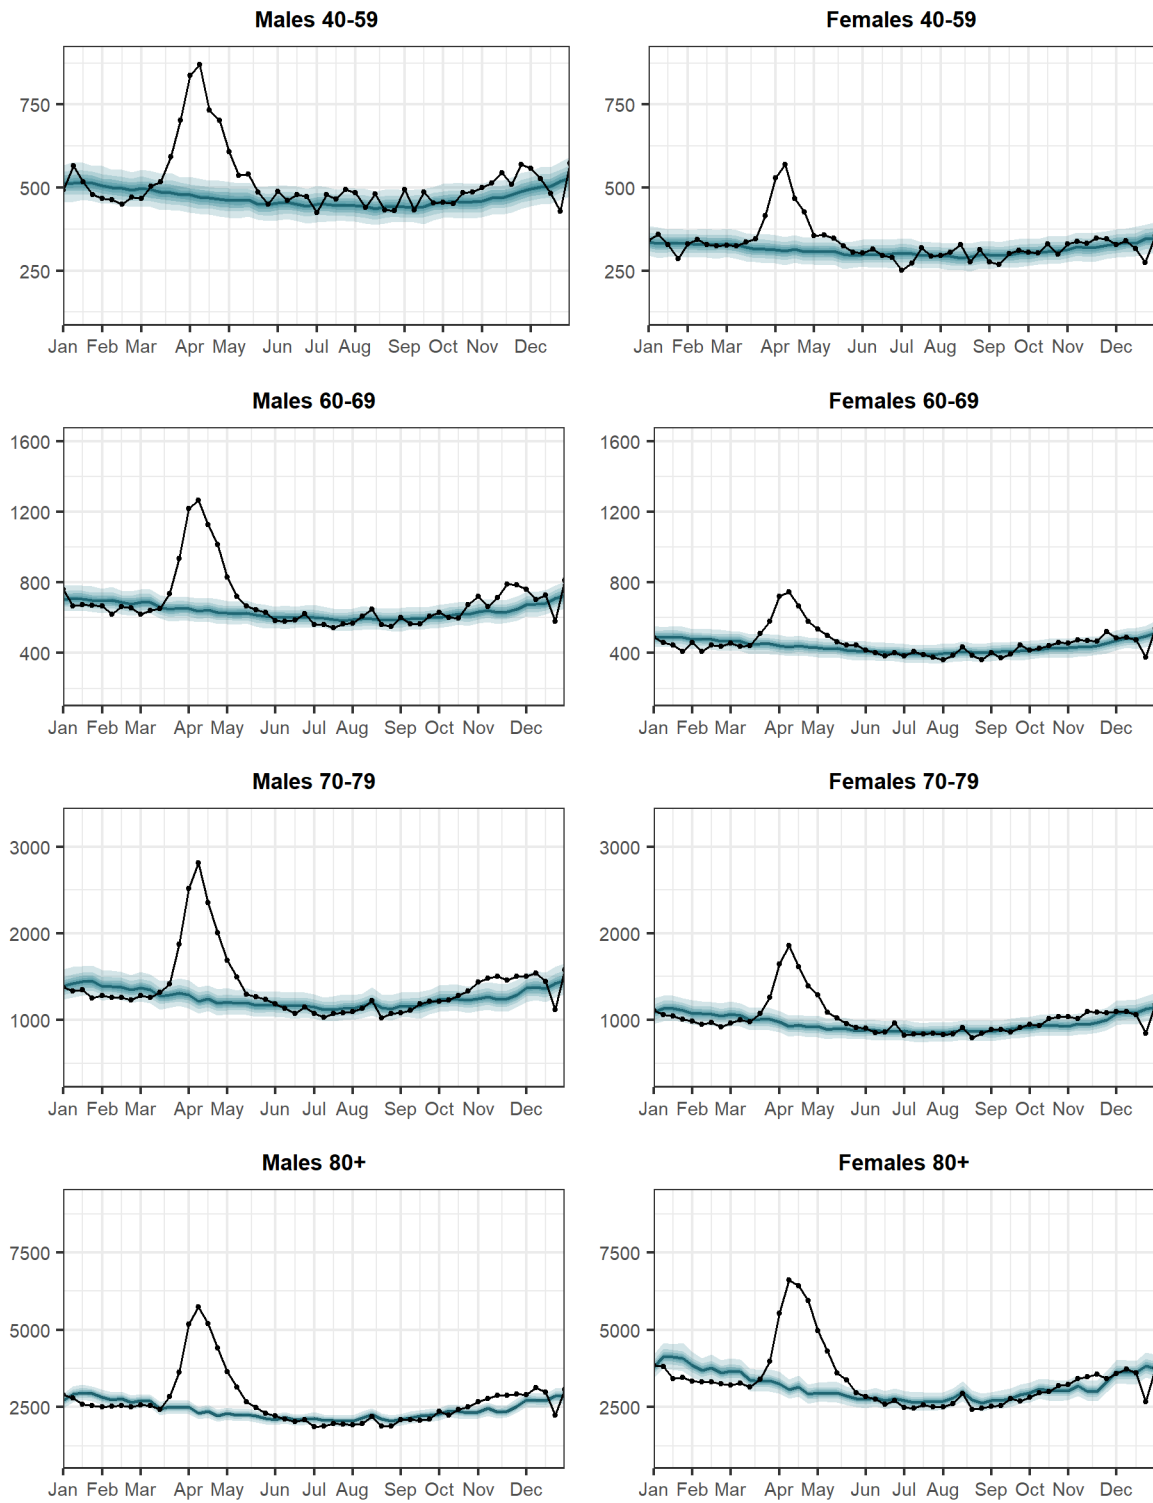



Supplementary Figure 8: Weekly trends for all-cause total number of deaths by gender and age in Greece. The blue curve represents the posterior mean predicted from the 2015–2019 model, while the shaded blue ribbon describes the posterior 95% interval. The black line shows the observed number of deaths for 2020.

**Greece**

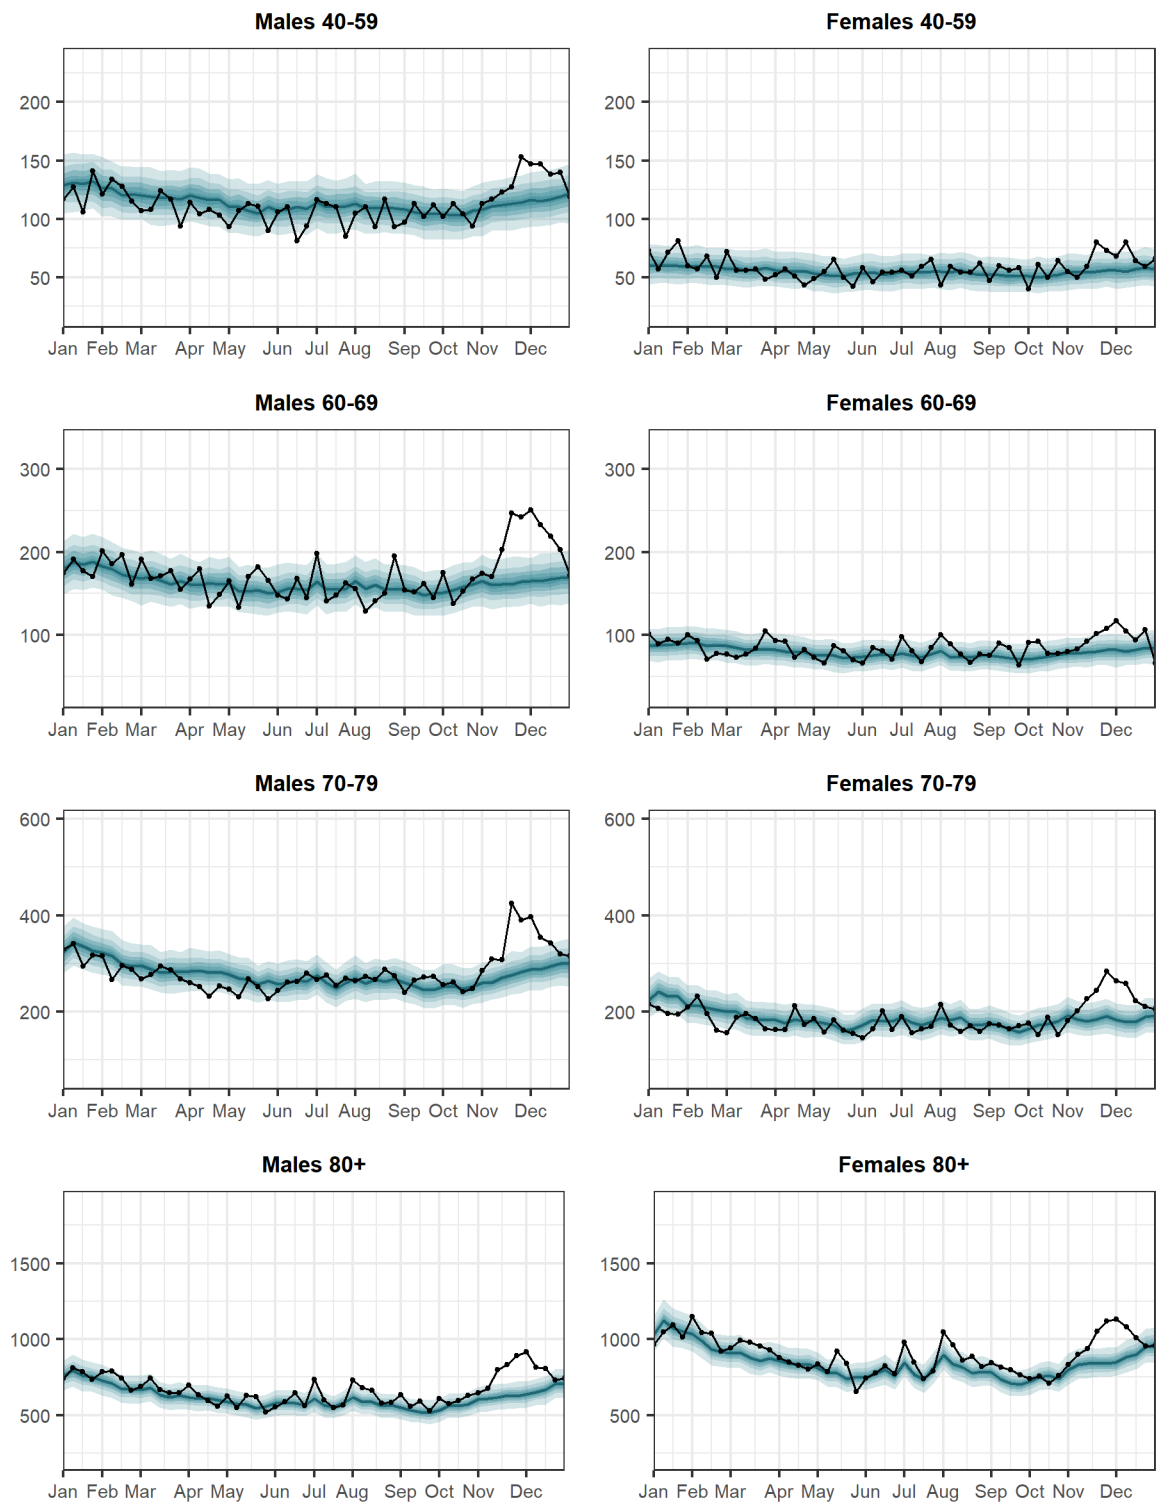

Supplementary Figure 9: Weekly trends for all-cause total number of deaths by gender and age in Italy. The blue curve represents the posterior mean predicted from the 2015–2019 model, while the shaded blue ribbon describes the posterior 95% interval. The black line shows the observed number of deaths for 2020.

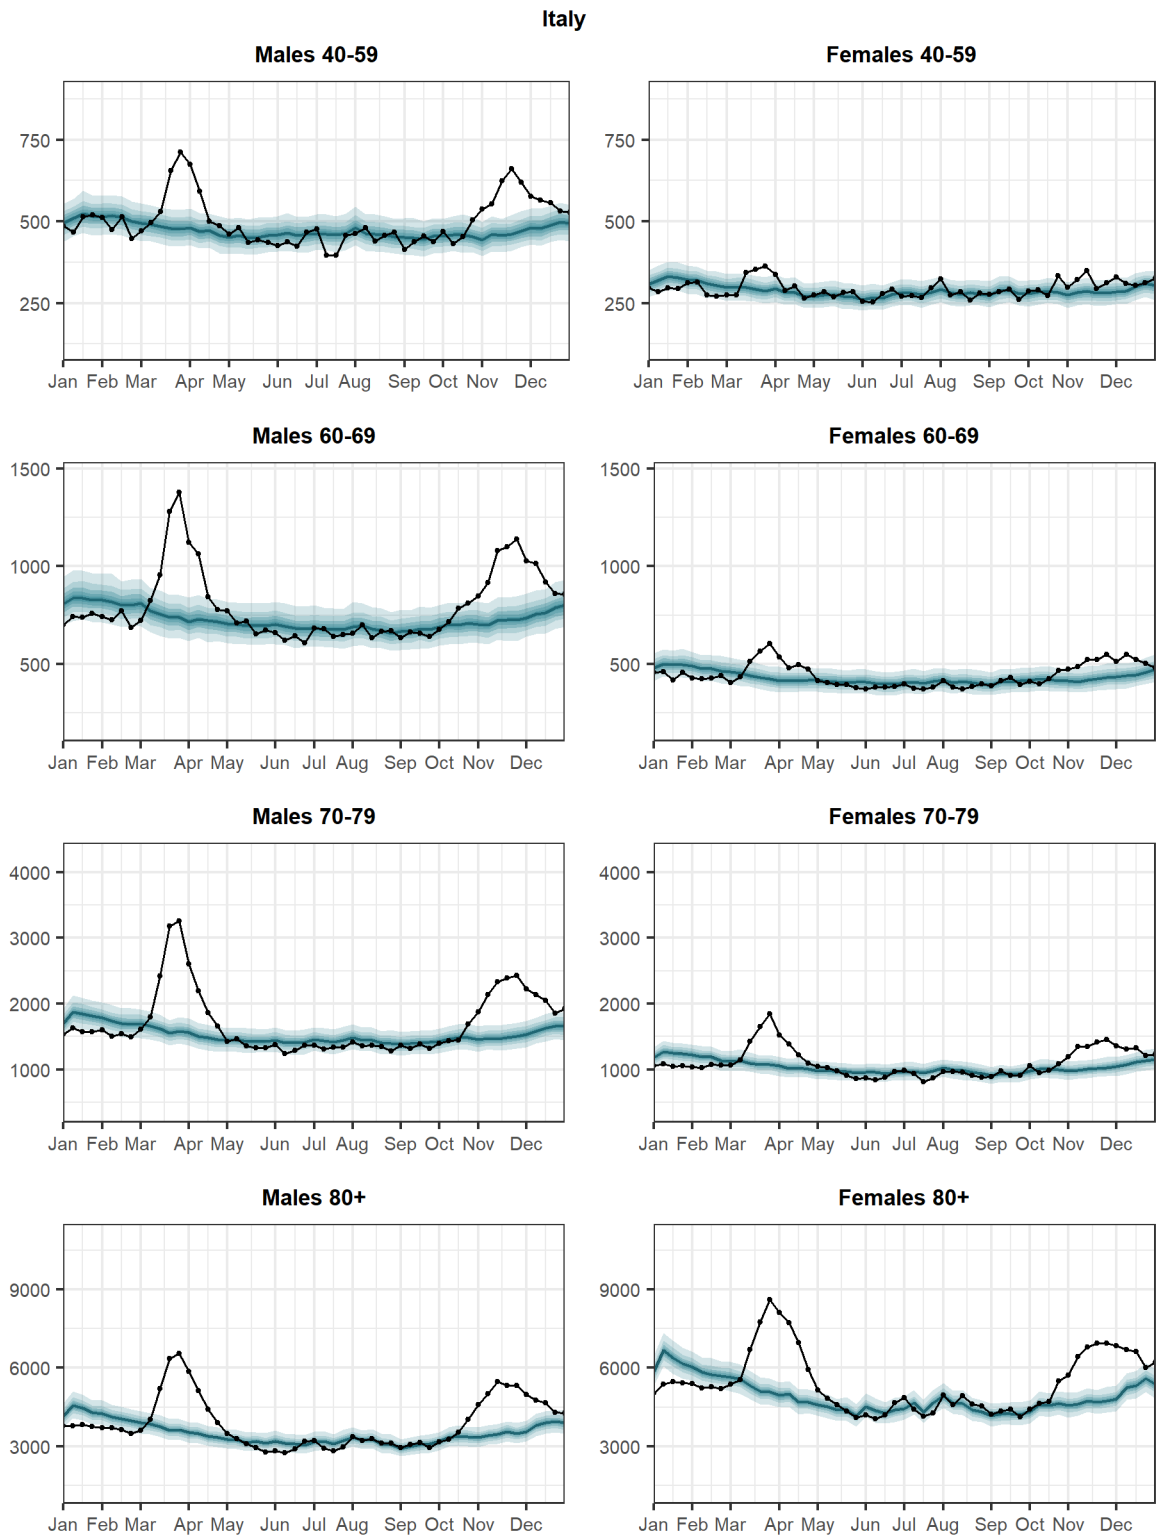

Supplementary Figure 10: Weekly trends for all-cause total number of deaths by gender and age in Spain. The blue curve represents the posterior mean predicted from the 2015–2019 model, while the shaded blue ribbon describes the posterior 95% interval. The black line shows the observed number of deaths for 2020.

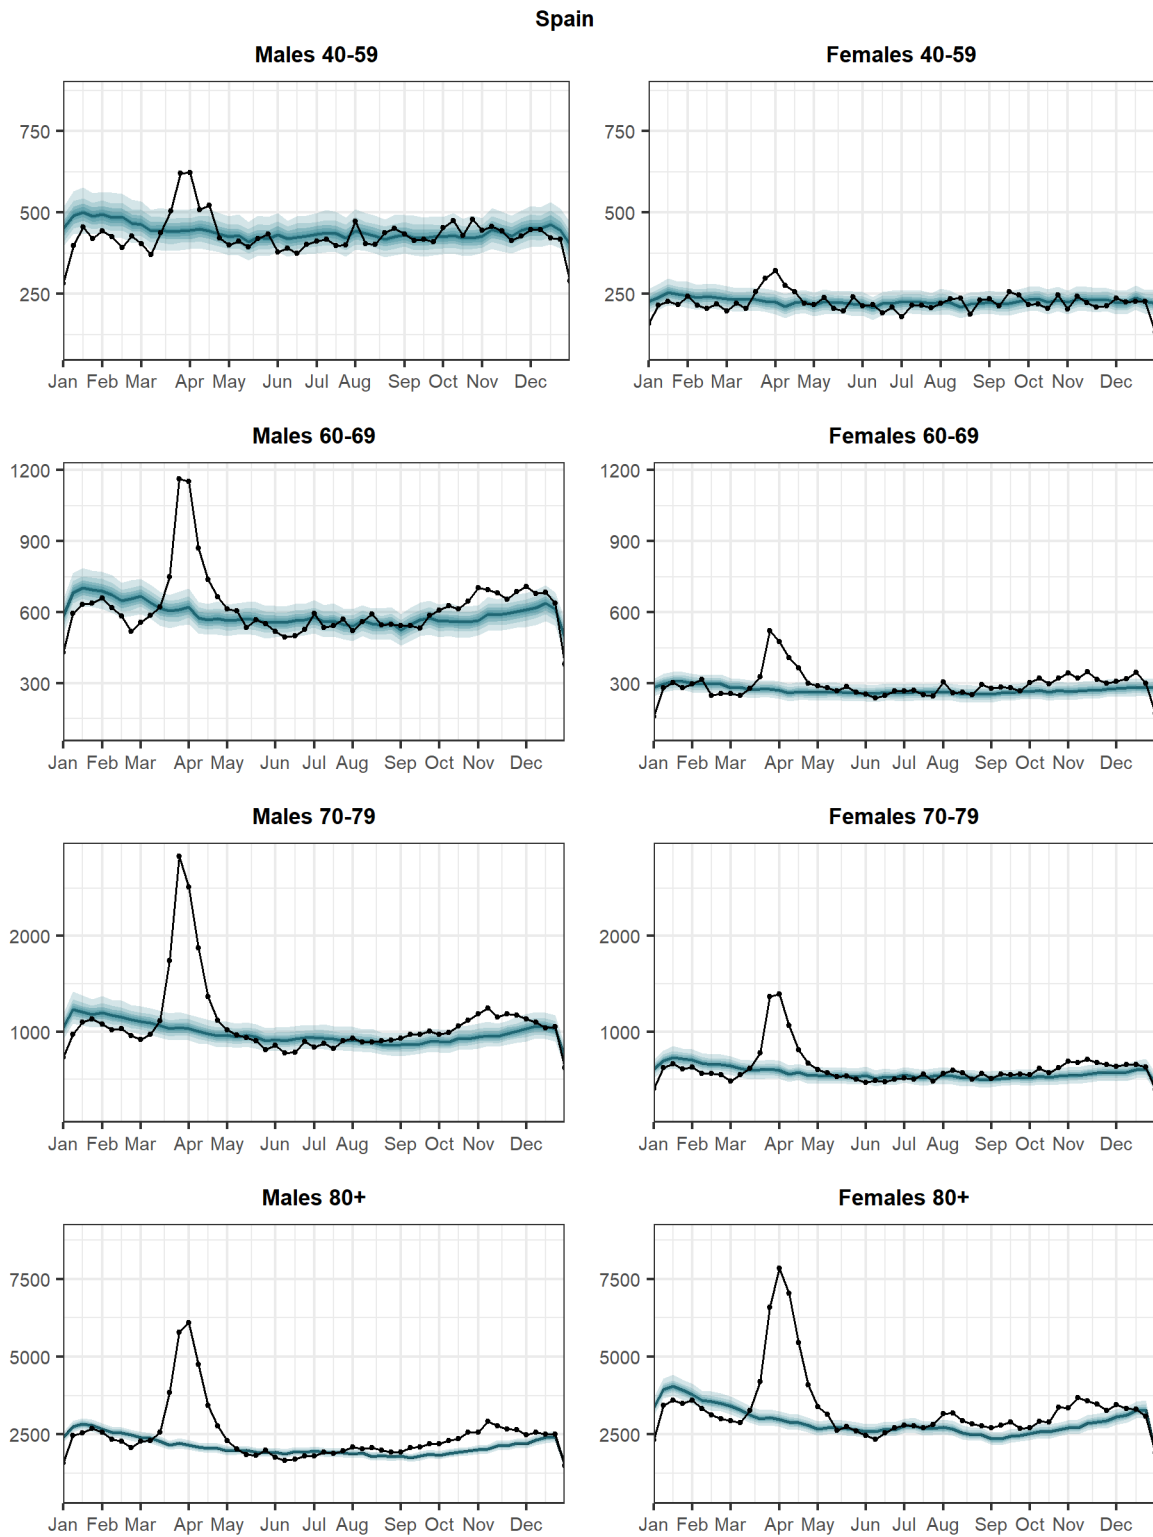

Supplementary Figure 11: Weekly trends for all-cause total number of deaths by gender and age in Switzerland. The blue curve represents the posterior mean predicted from the 2015–2019 model, while the shaded blue ribbon describes the posterior 95% interval. The black line shows the observed number of deaths for 2020.

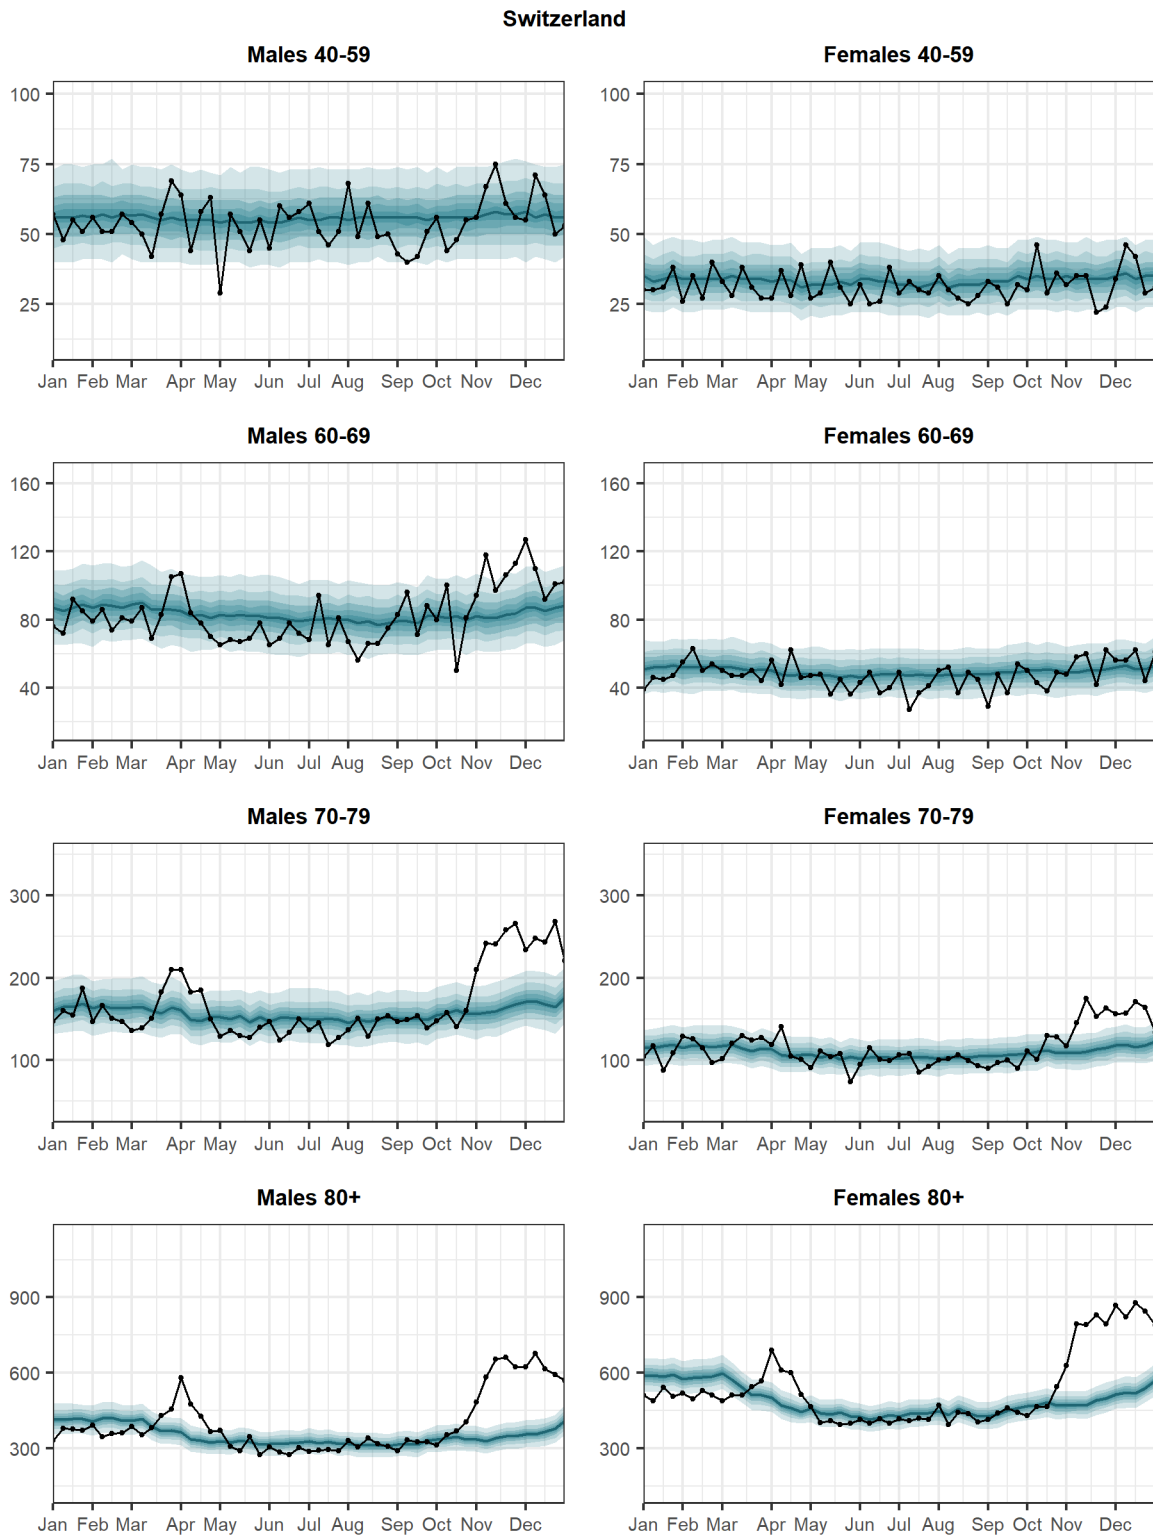

Supplementary Figure 12: Relative excess mortality during 2020 by NUTS3 regions in England stratified by age and sex.

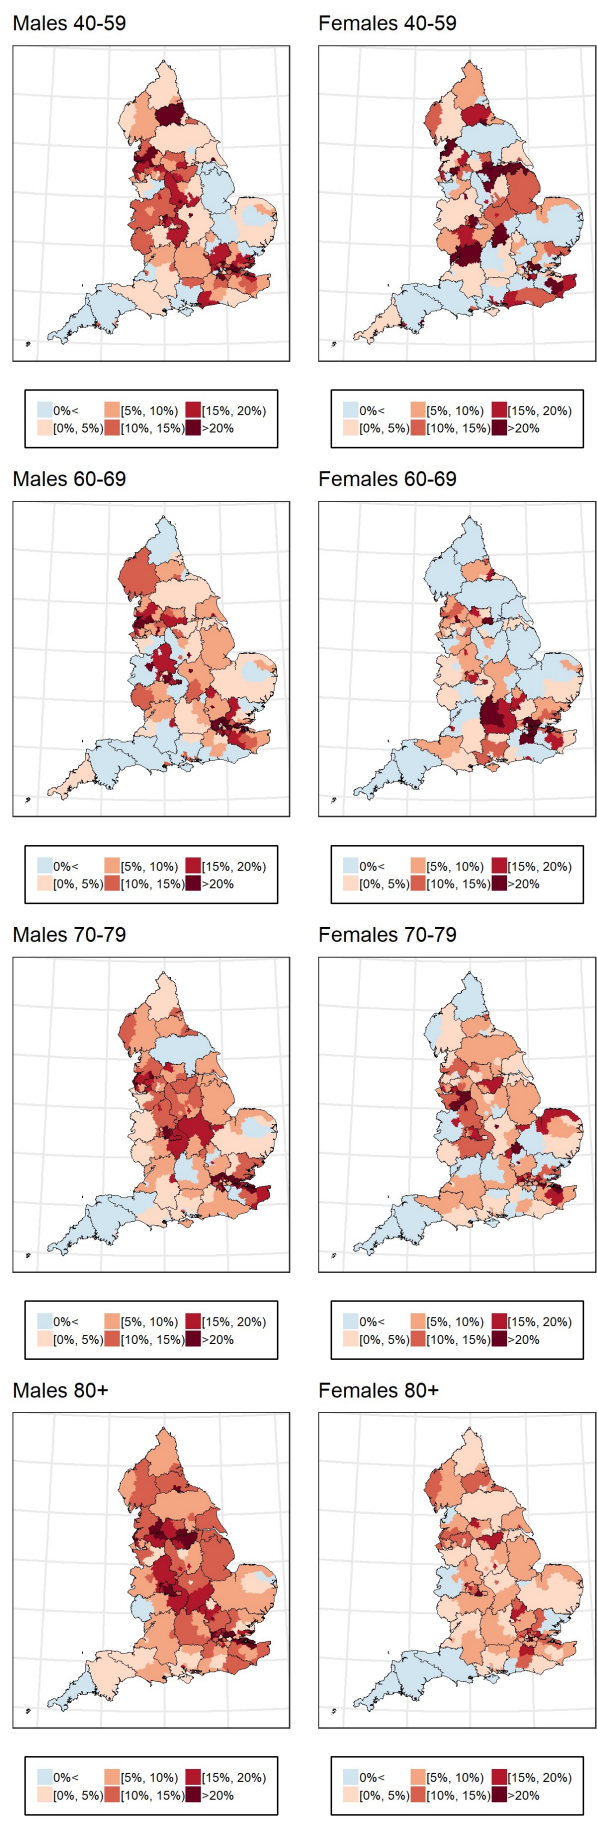

Supplementary Figure 13: Posterior probability that the relative excess mortality is larger than zero during 2020 by NUTS3 regions in England stratified by age and sex.

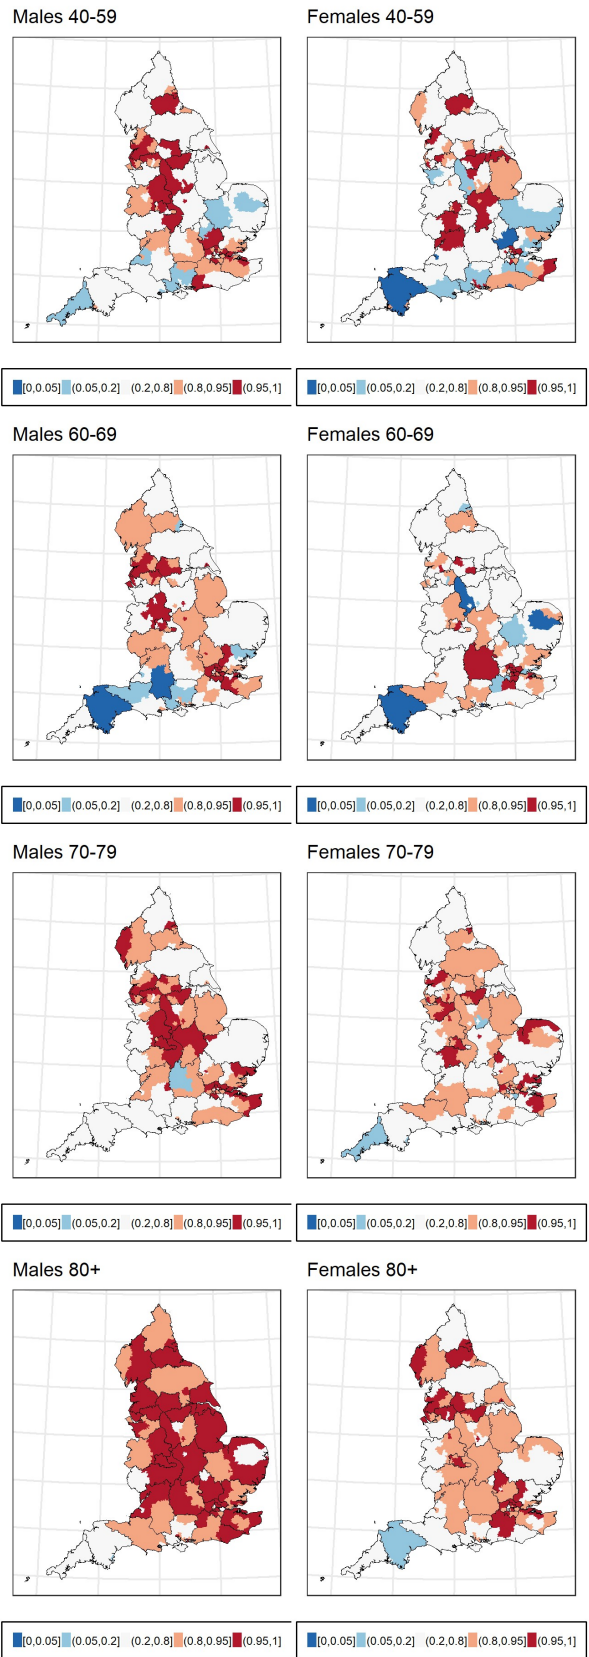

Supplementary Figure 14: Relative excess mortality during 2020 by NUTS3 regions in Greece stratified by age and sex.

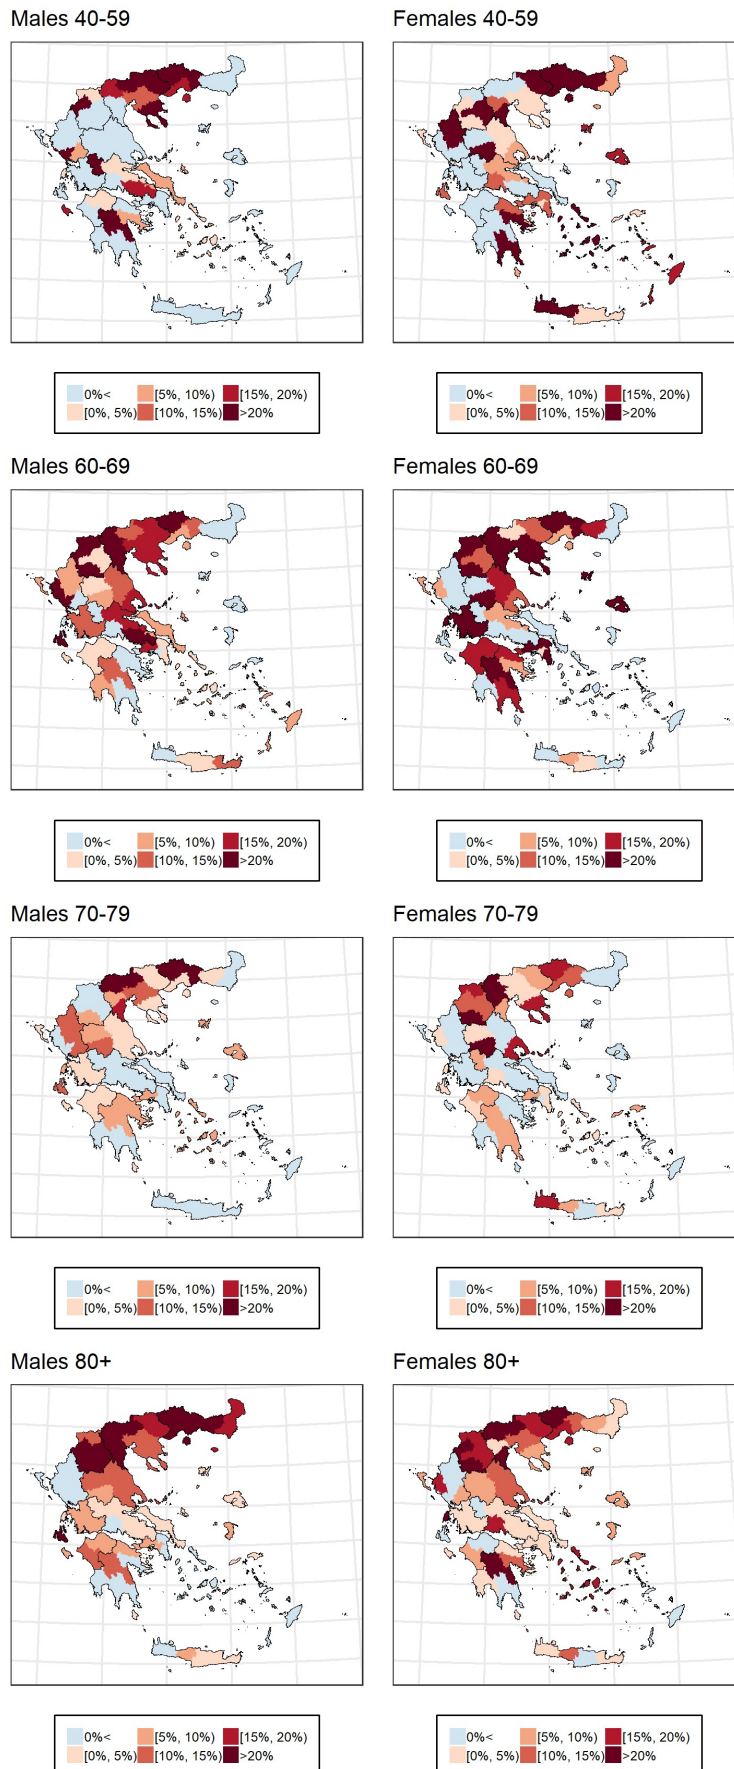



Supplementary Figure 15: Posterior probability that the relative excess mortality is larger than zero during 2020 by NUTS3 regions in Greece stratified by age and sex.

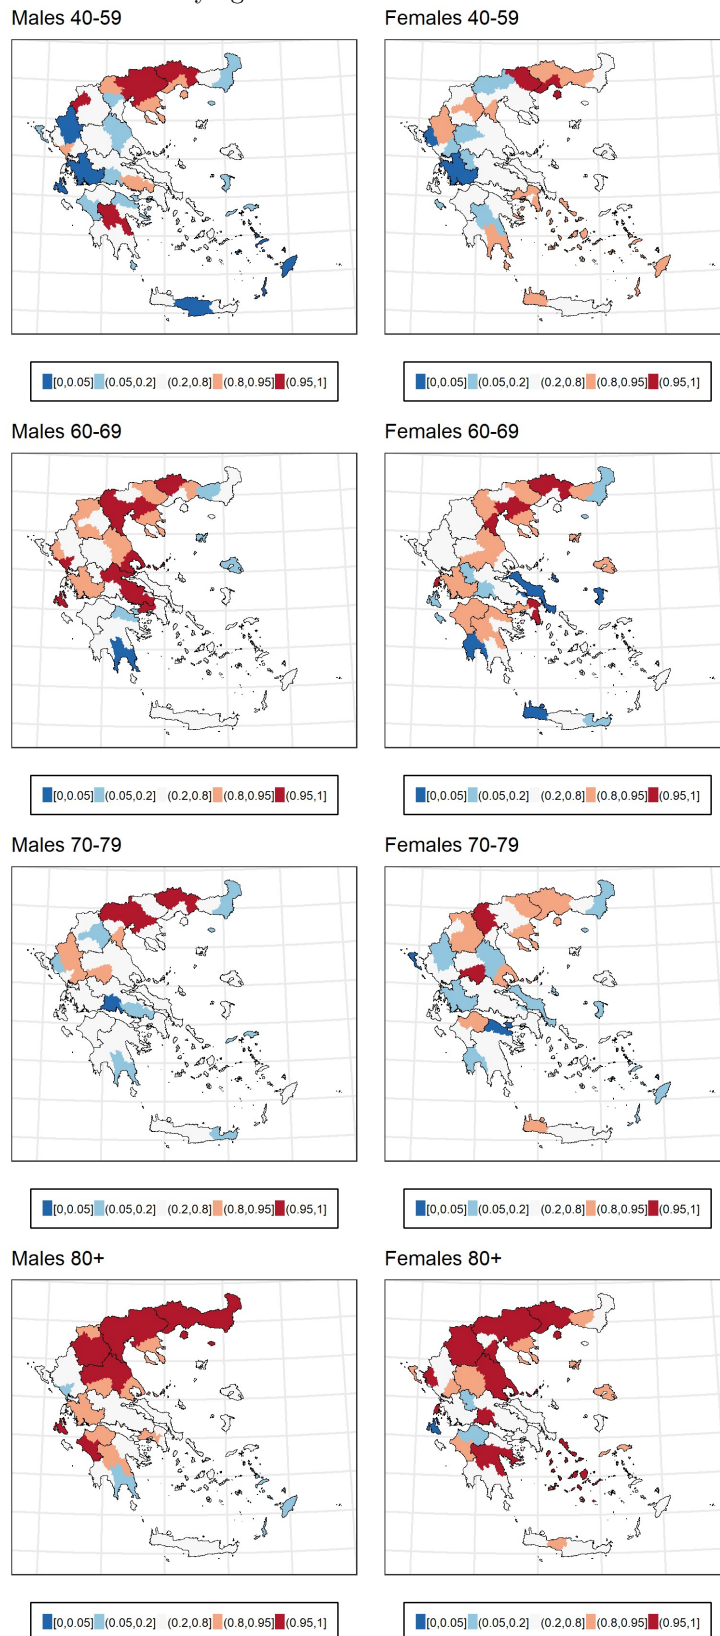



Supplementary Figure 16: Relative excess mortality during 2020 by NUTS3 regions in Italy stratified by age and sex.

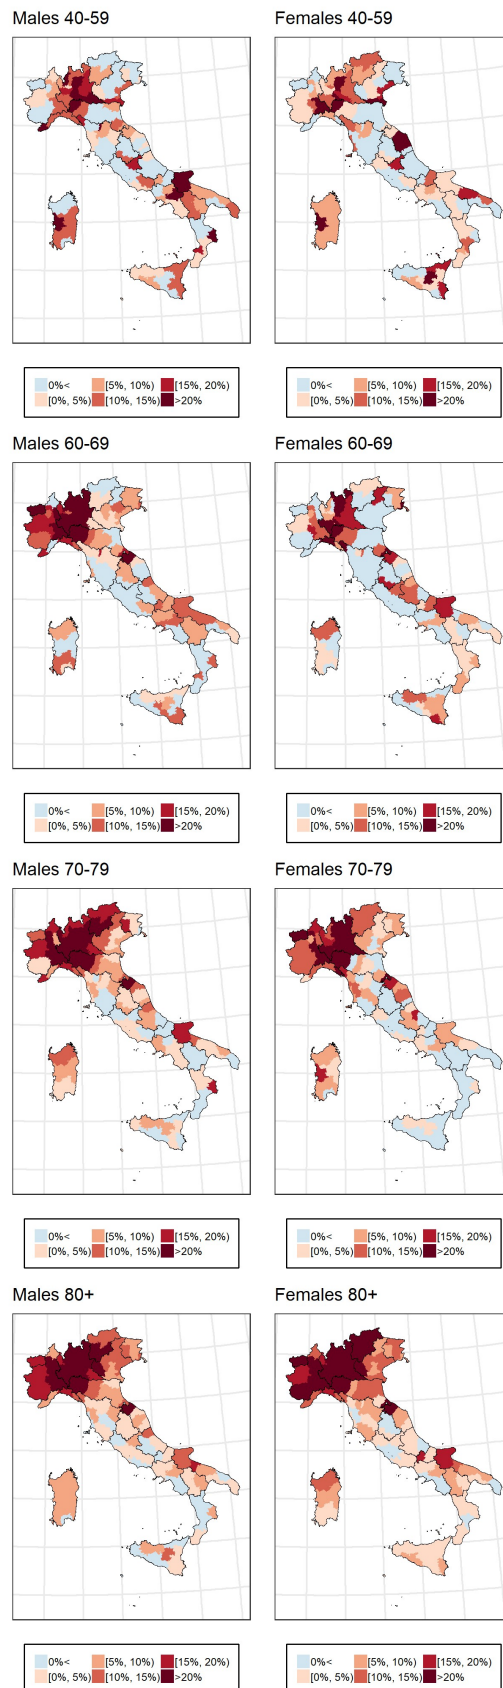

Supplementary Figure 17: Posterior probability that the relative excess mortality is larger than zero during 2020 by NUTS3 regions in Italy stratified by age and sex.

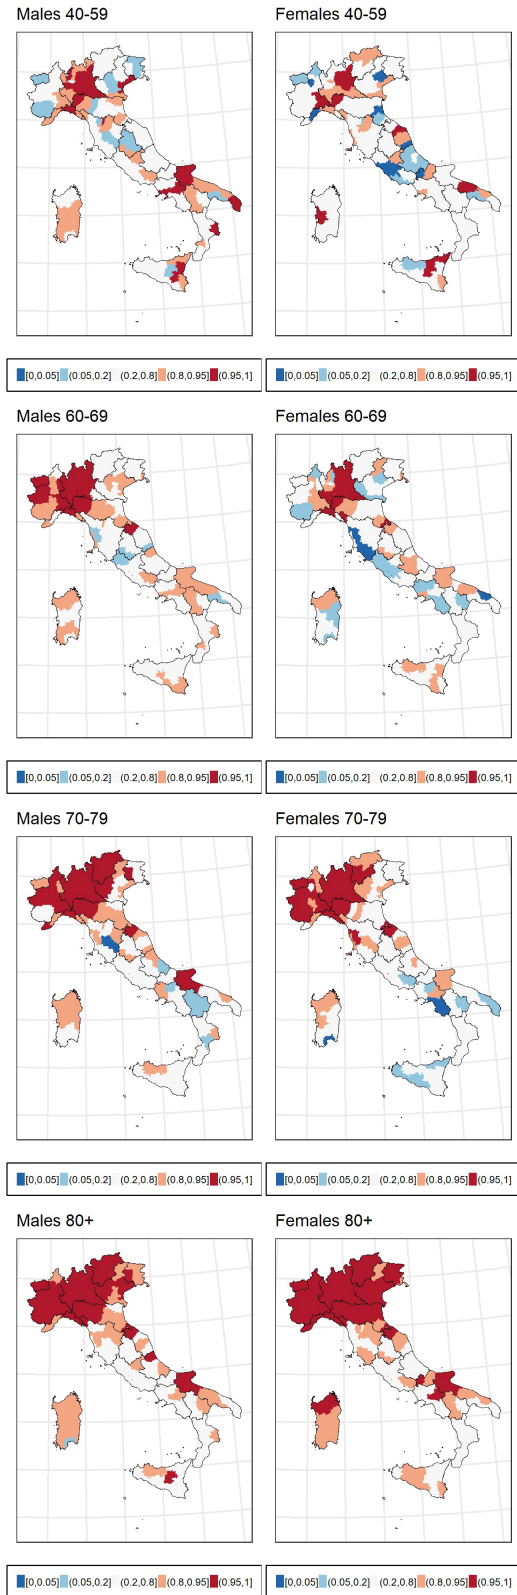

Supplementary Figure 18: Relative excess mortality during 2020 by NUTS3 regions in Spain stratified by age and sex.

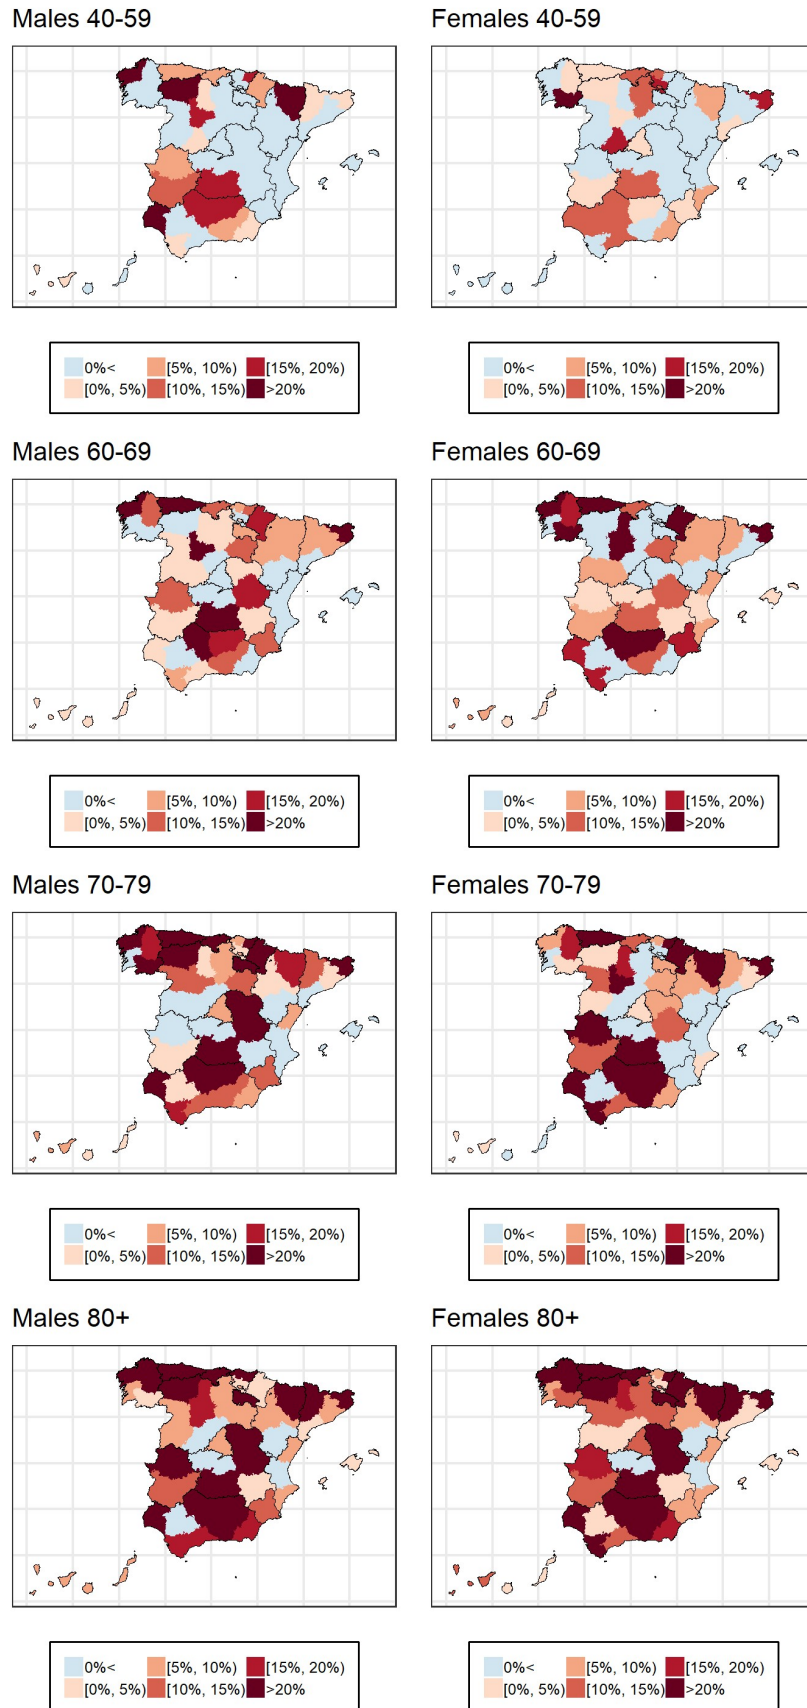

Supplementary Figure 19: Posterior probability that the relative excess mortality is larger than zero during 2020 by NUTS3 regions in Spain stratified by age and sex.

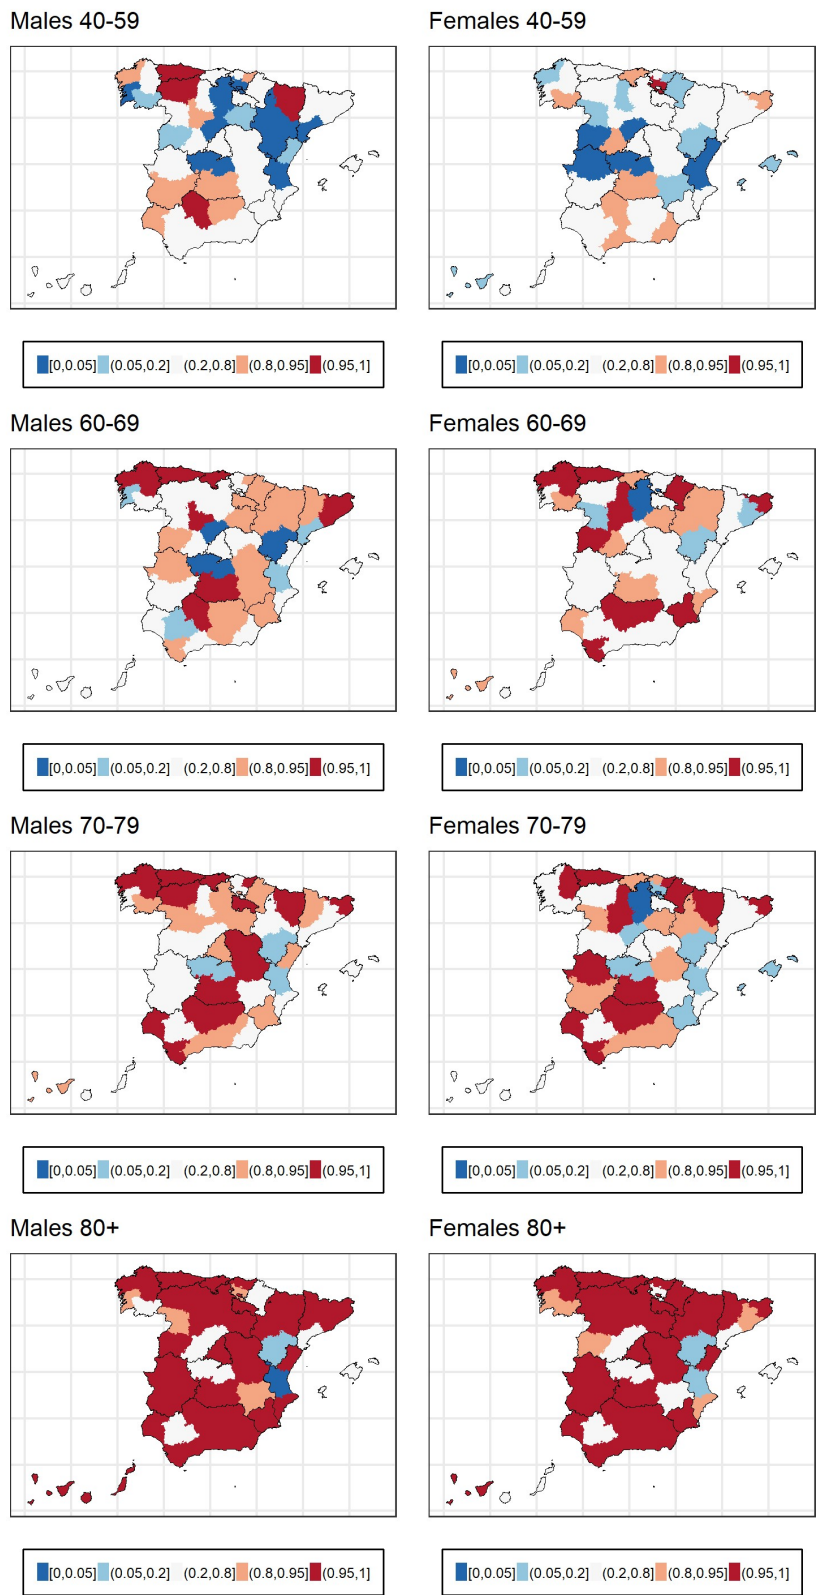

Supplementary Figure 20: Relative excess mortality during 2020 by NUTS3 regions in Switzerland stratified by age and sex.

Males 40-59

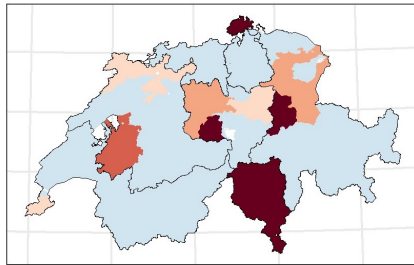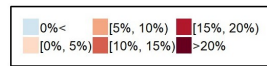

Females 40-59

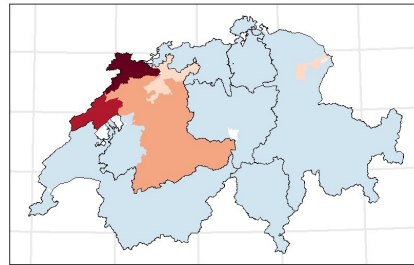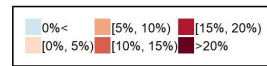

Males 60-69

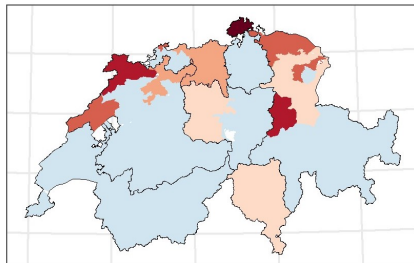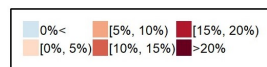

Females 60-69

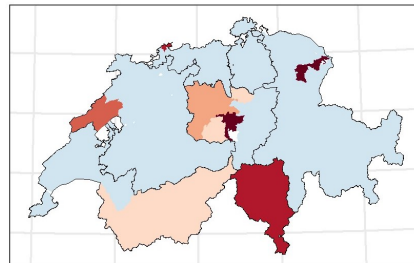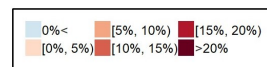

Males 70-79

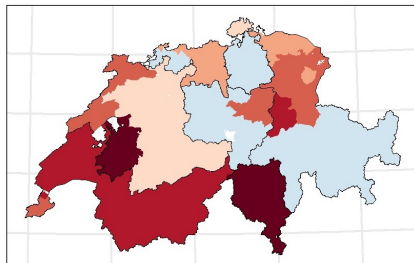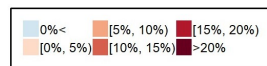

Females 70-79

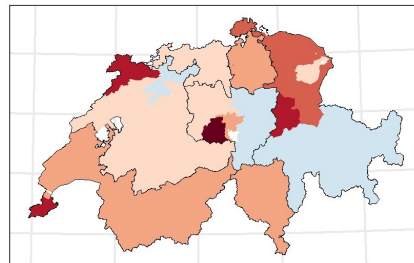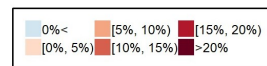

Males 80+

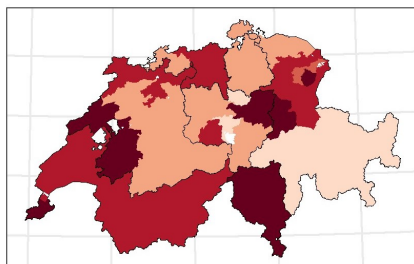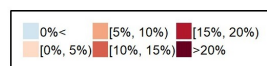

Females 80+

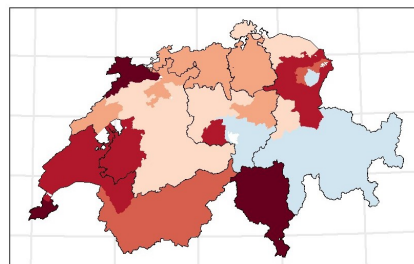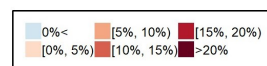

Supplementary Figure 21: Posterior probability that the relative excess mortality is larger than zero during 2020 by NUTS3 regions in Switzerland stratified by age and sex.

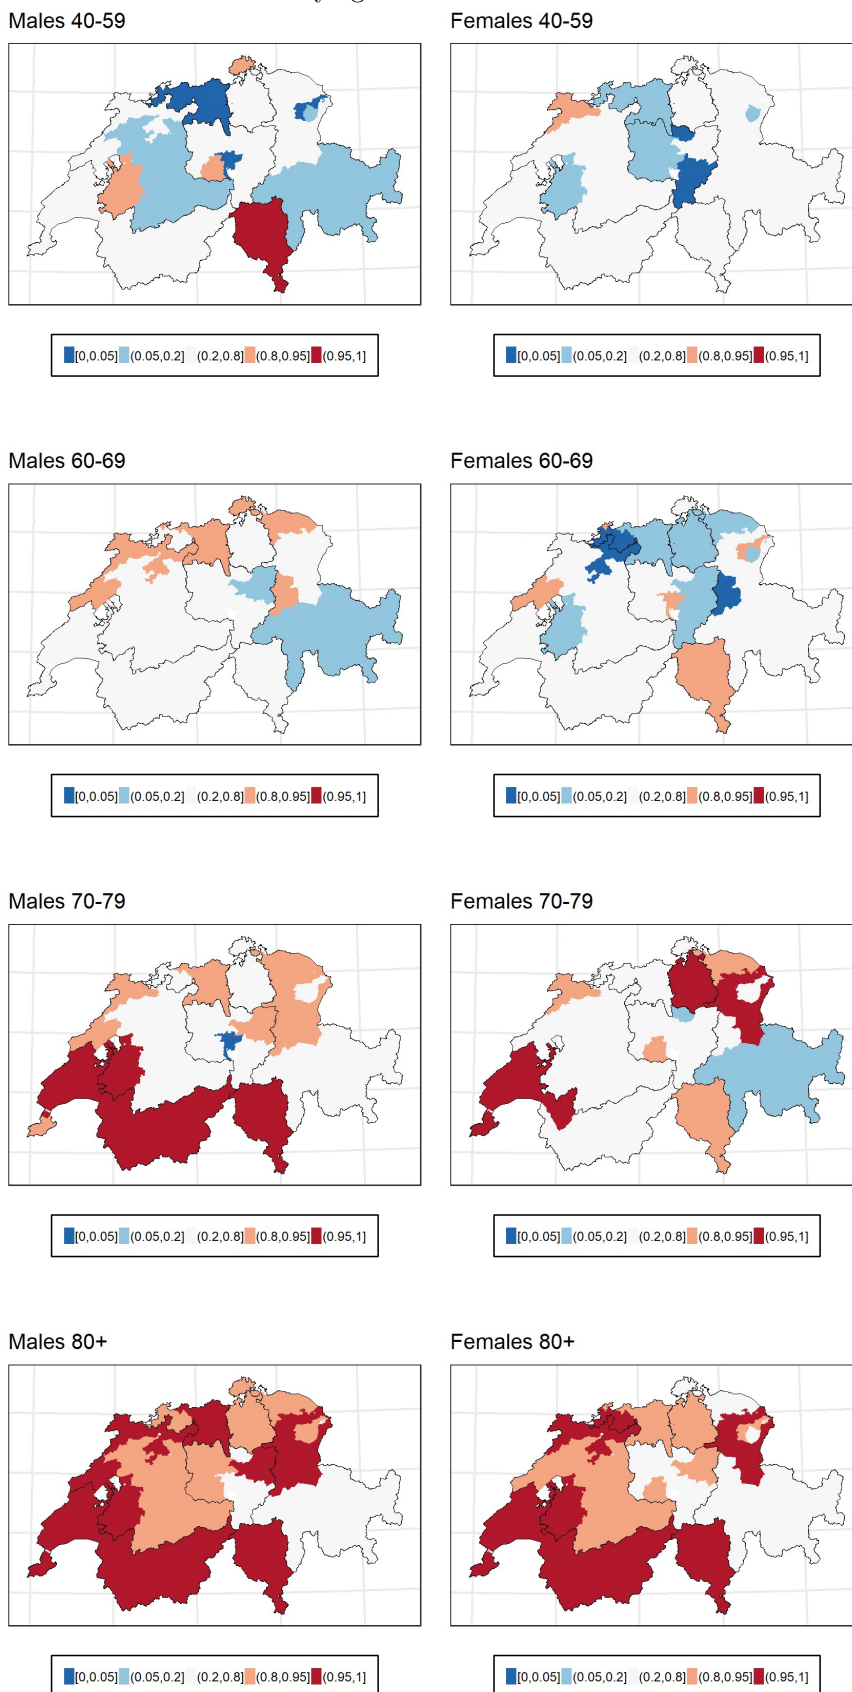



Supplementary Figure 22: Relative excess mortality during January-June 2020 by NUTS3 regions in England stratified by age and sex.

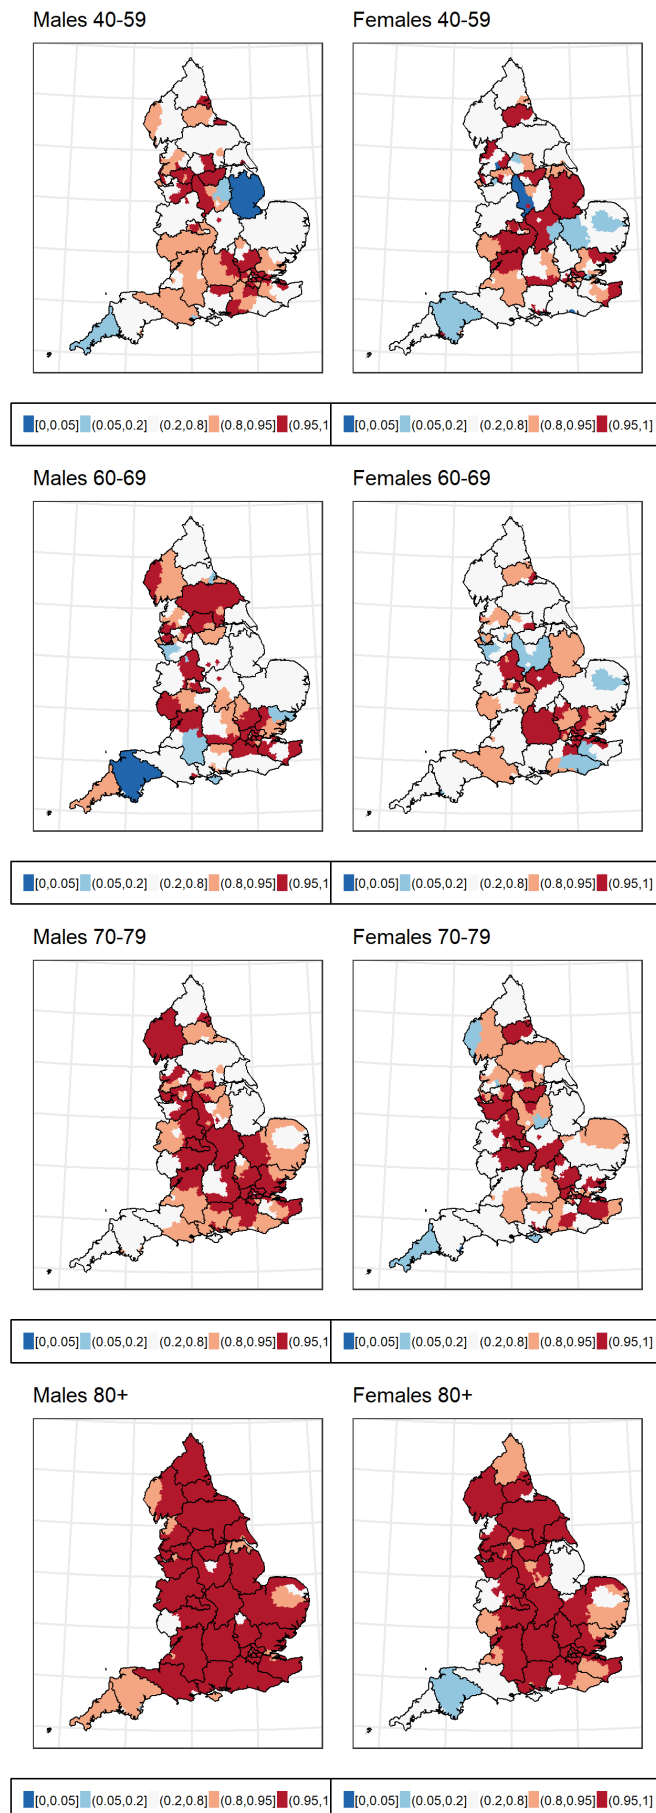

Supplementary Figure 23: Relative excess mortality during July-December 2020 by NUTS3 regions in England stratified by age and sex.

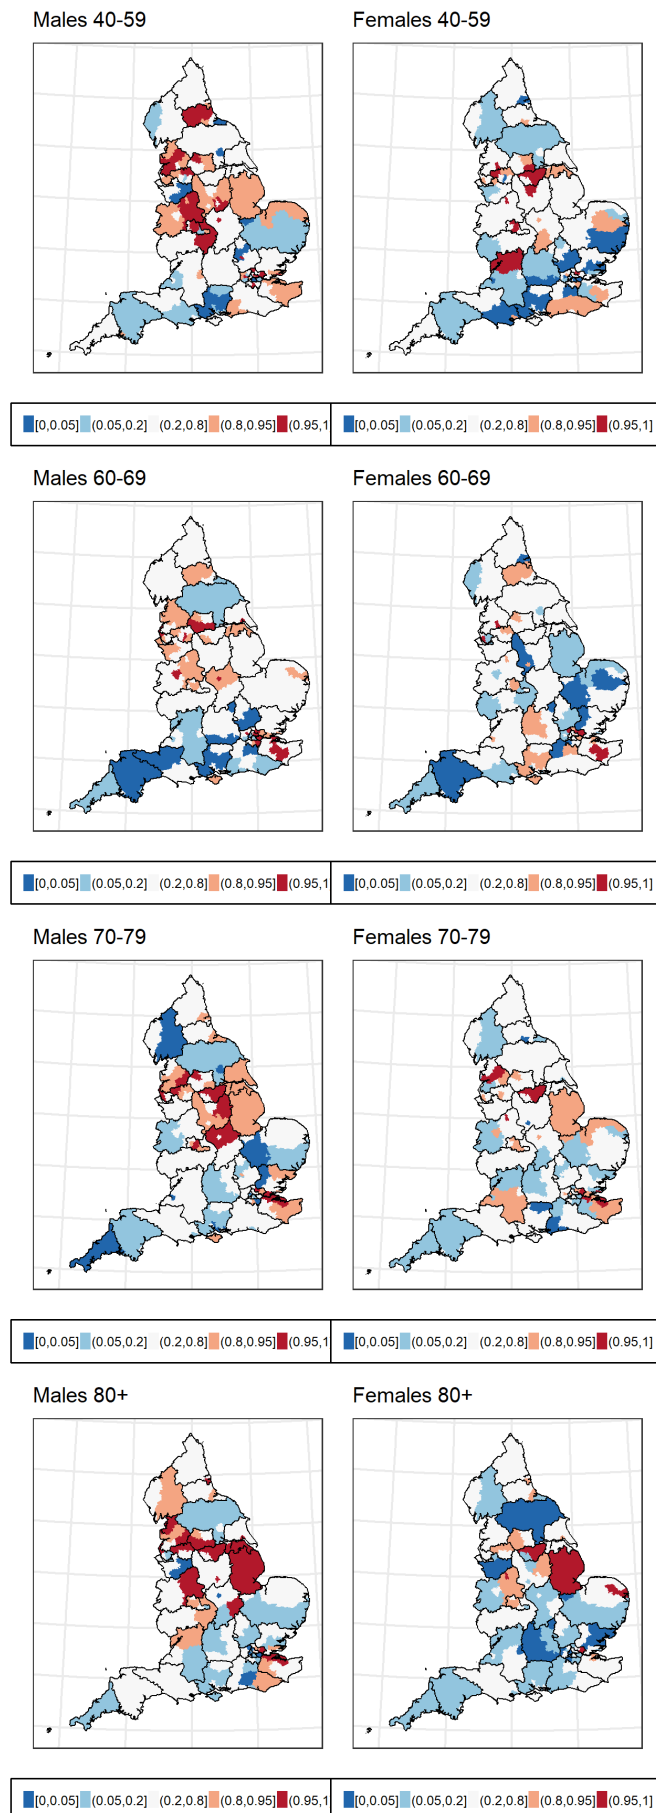



Supplementary Figure 24: Posterior probability that the relative excess mortality is larger than zero during January-June 2020 by NUTS3 regions in England stratified by age and sex.

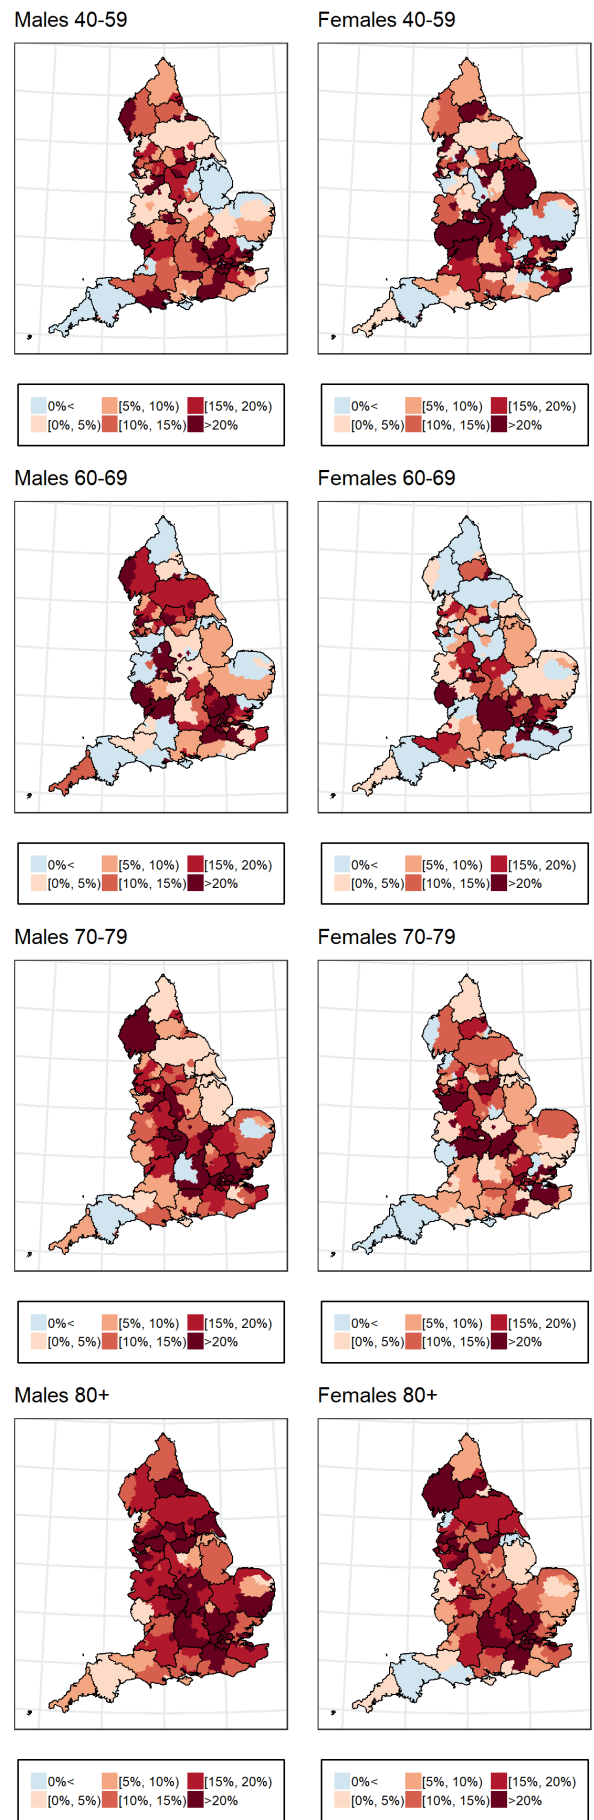

Supplementary Figure 25: Posterior probability that the relative excess mortality is larger than zero during July-December 2020 by NUTS3 regions in England stratified by age and sex.

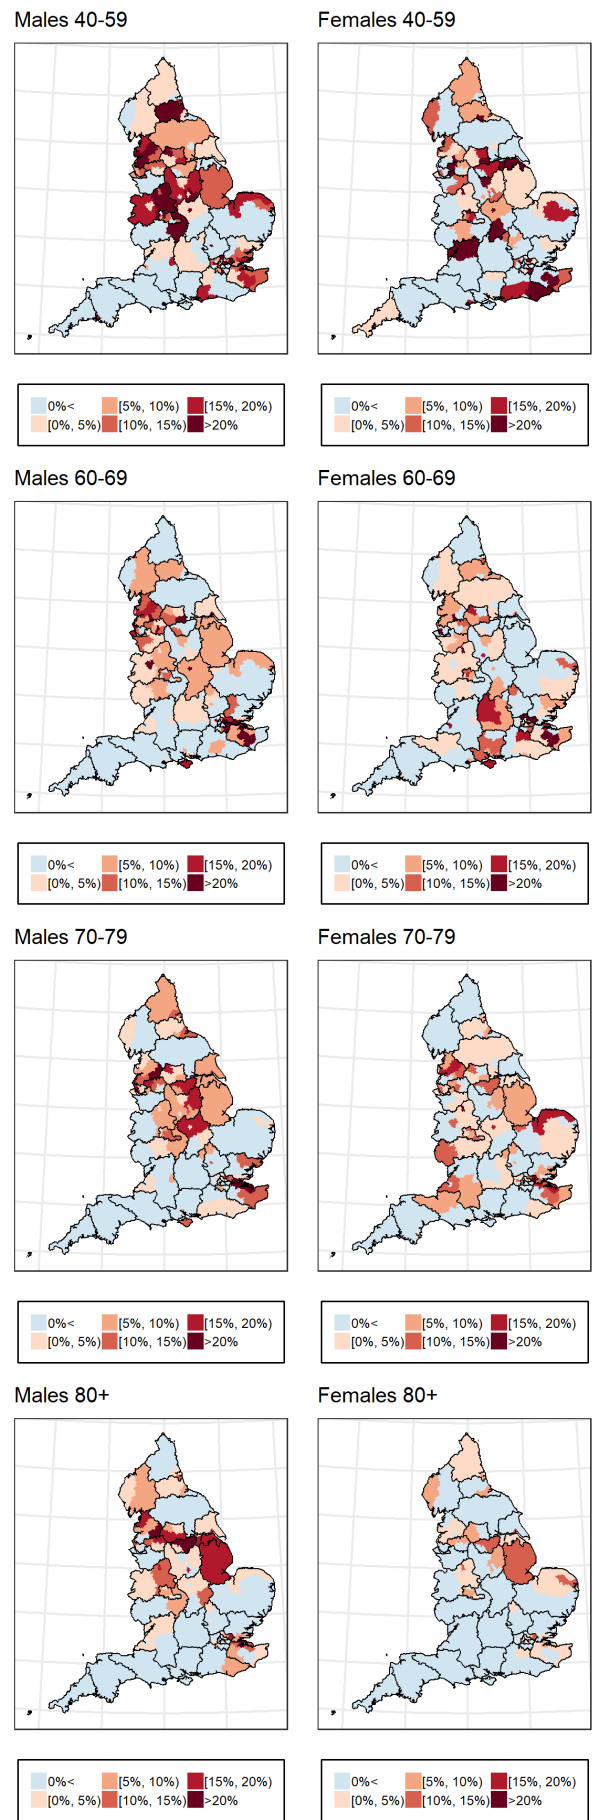

Supplementary Figure 26: Relative excess mortality during January-June 2020 by NUTS3 regions in Greece stratified by age and sex.

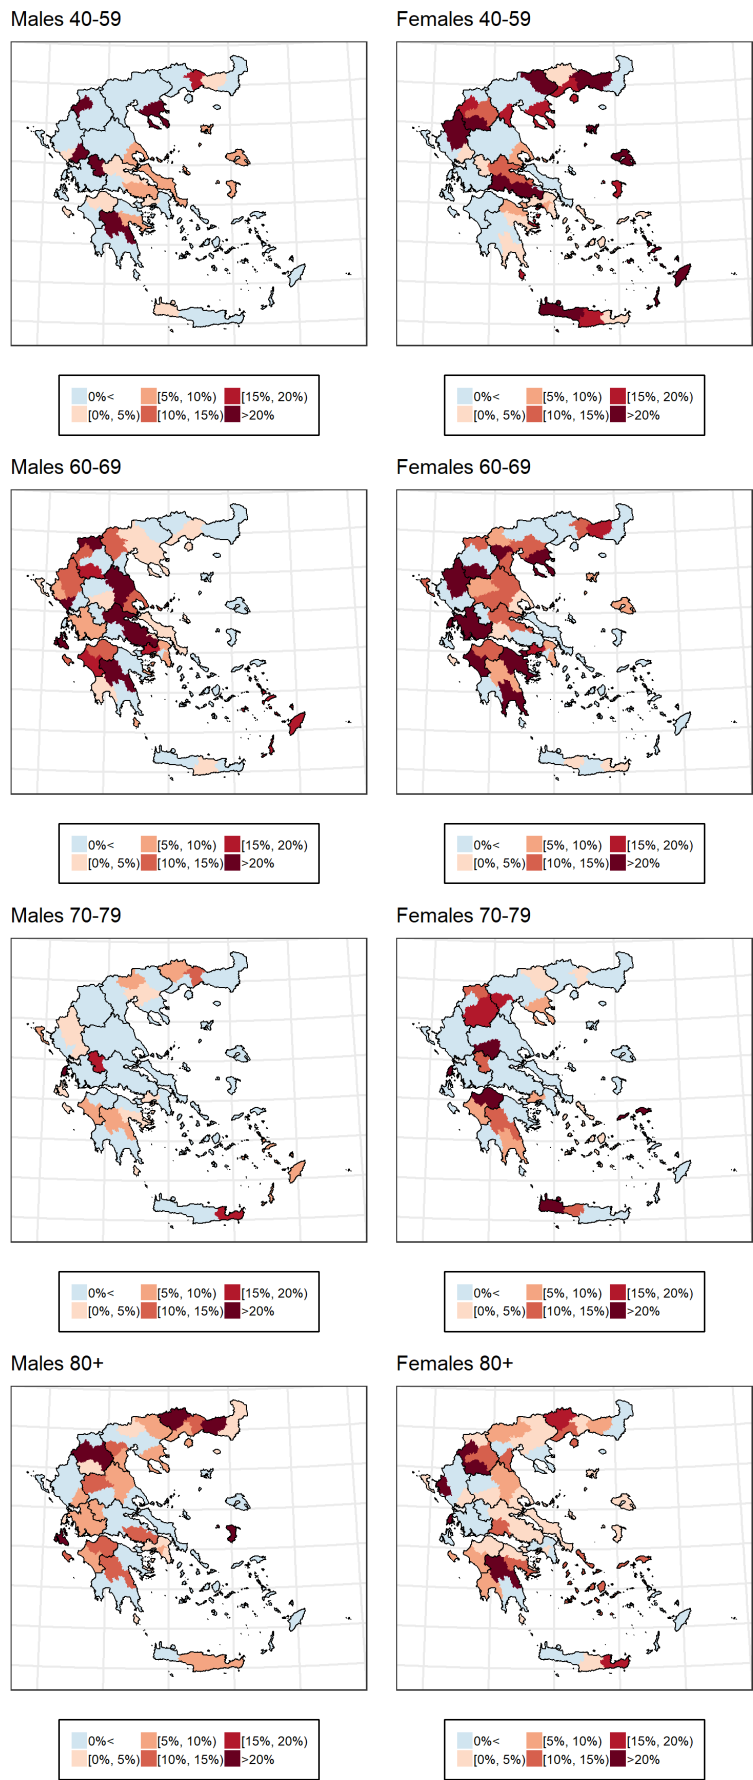

Supplementary Figure 27: Relative excess mortality during July-December 2020 by NUTS3 regions in Greece stratified by age and sex.

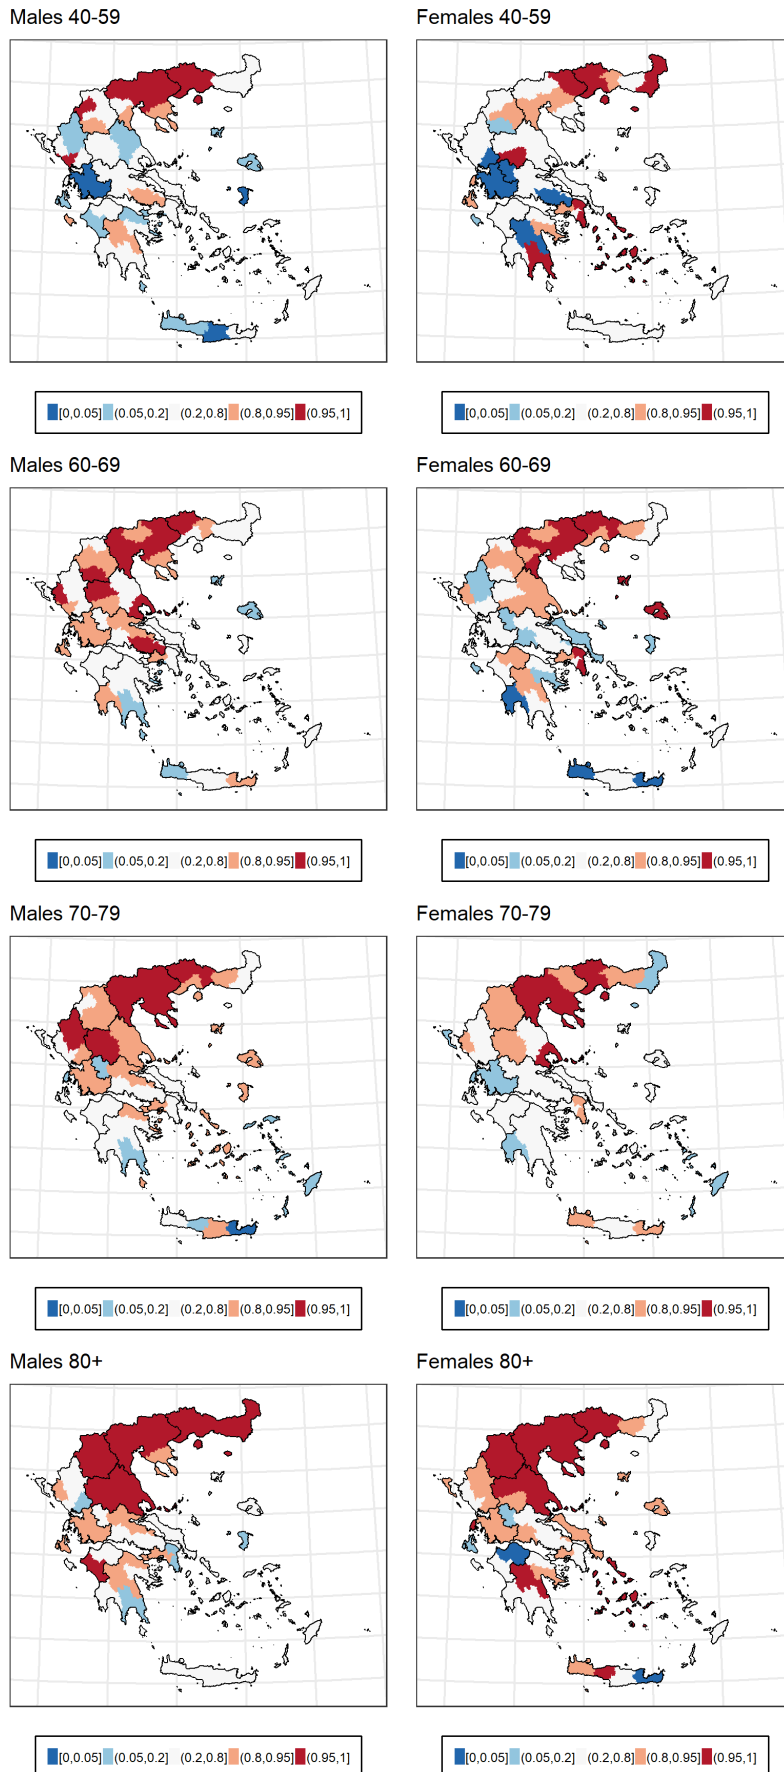

Supplementary Figure 28: Posterior probability that the relative excess mortality is larger than zero during January-June 2020 by NUTS3 regions in Greece stratified by age and sex.

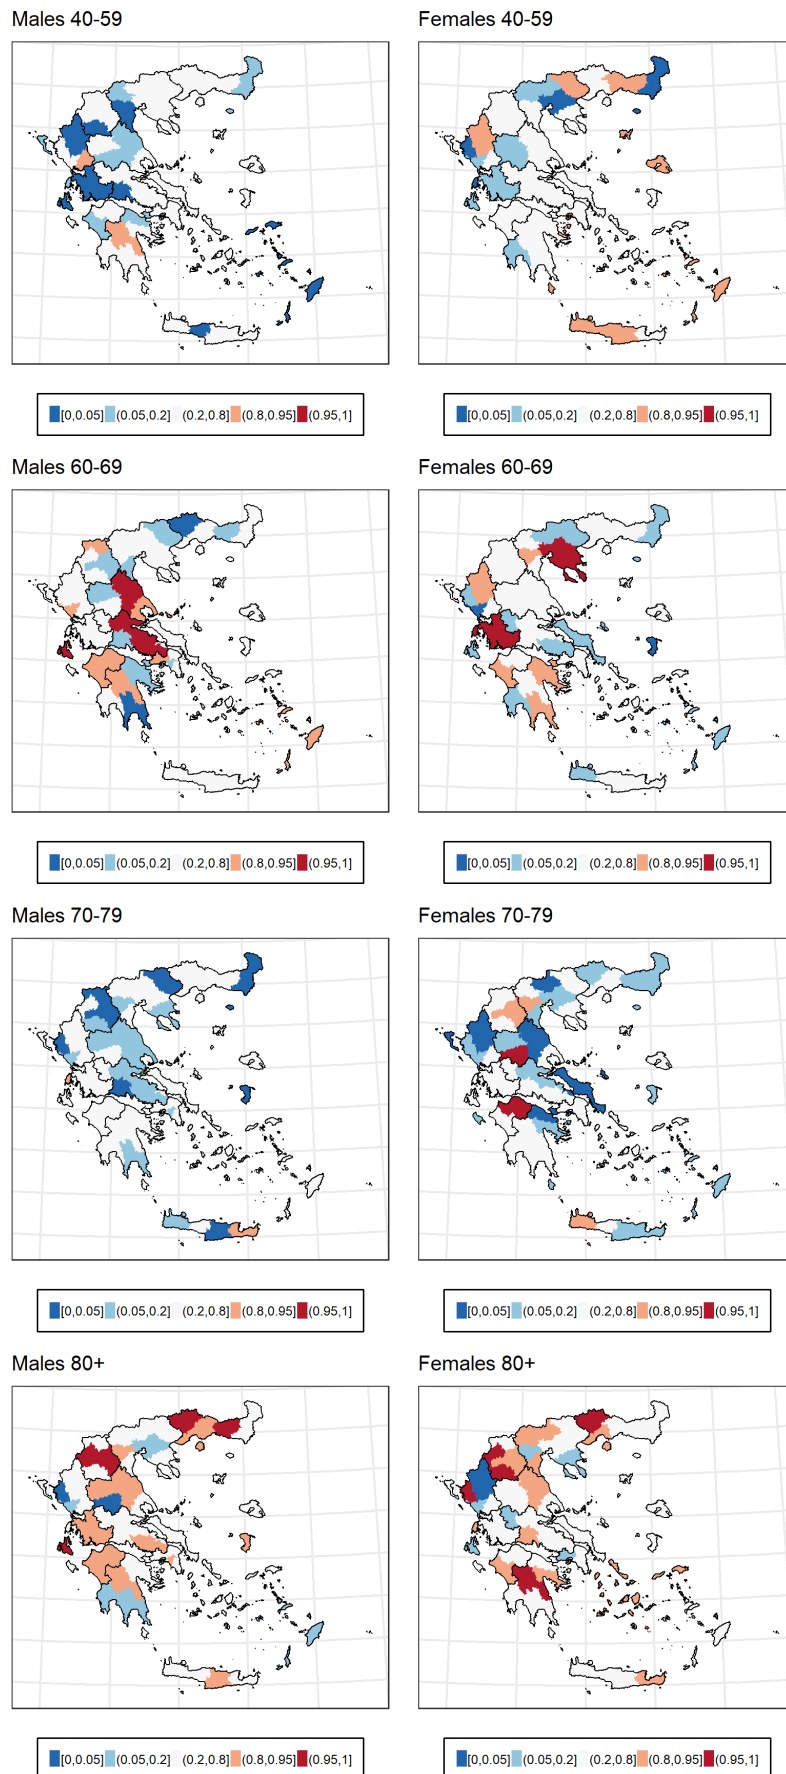

Supplementary Figure 29: Posterior probability that the relative excess mortality is larger than zero during July-December 2020 by NUTS3 regions in Greece stratified by age and sex.

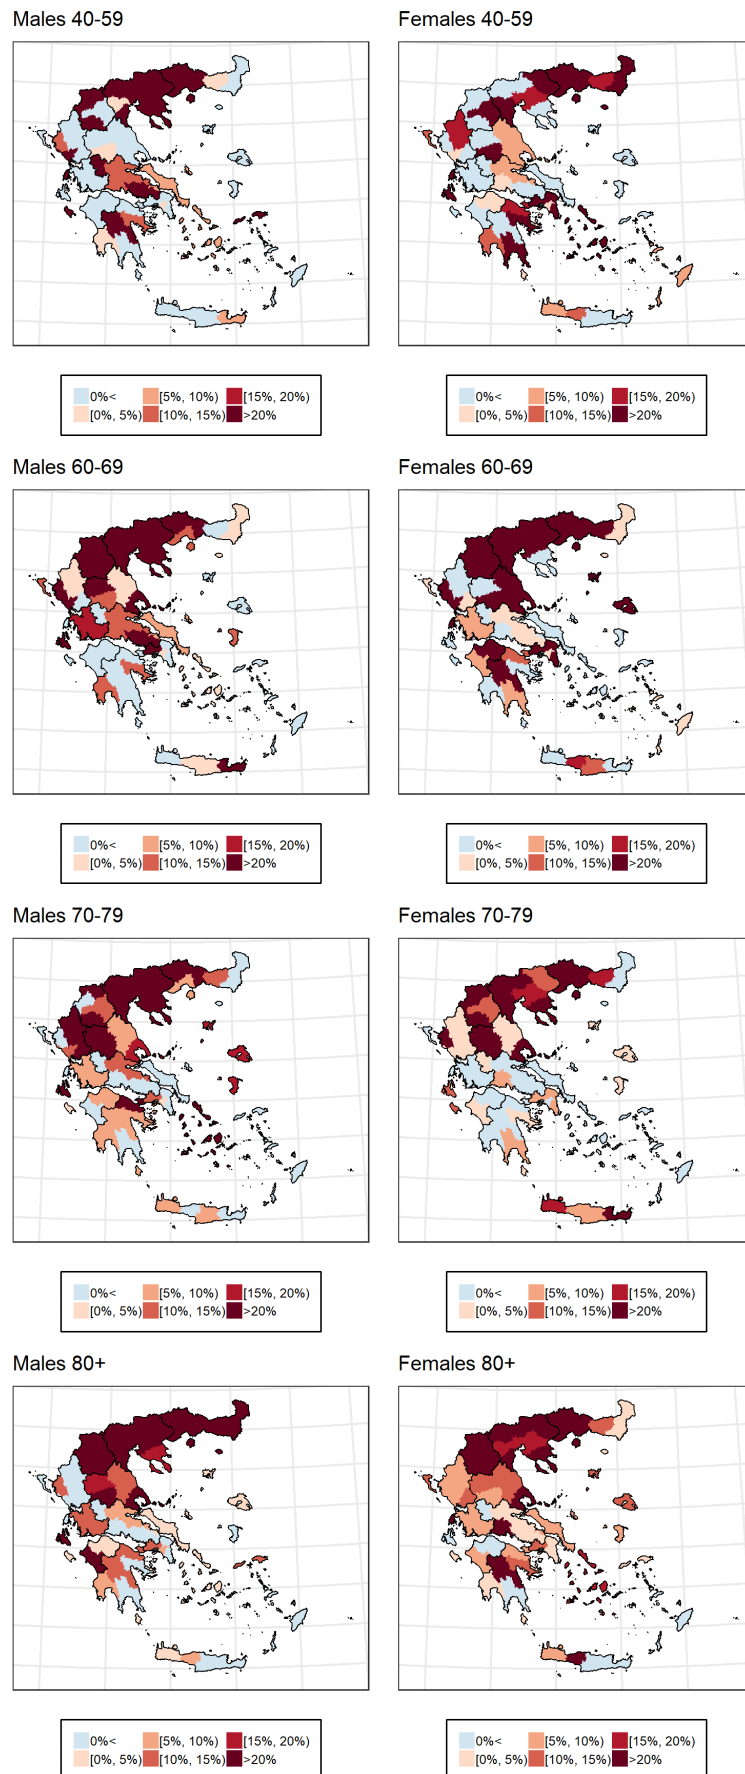

Supplementary Figure 30: Relative excess mortality during January-June 2020 by NUTS3 regions in Italy stratified by age and sex.

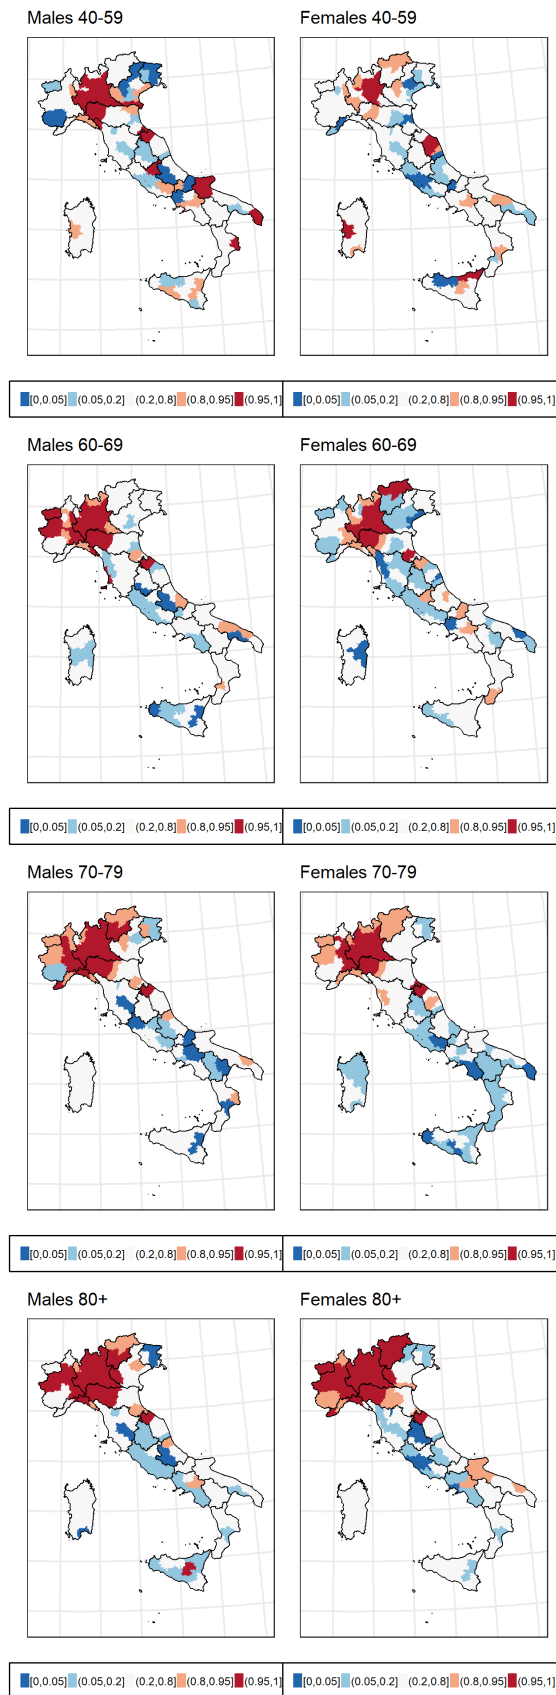

Supplementary Figure 31: Relative excess mortality during July-December 2020 by NUTS3 regions in Italy stratified by age and sex.

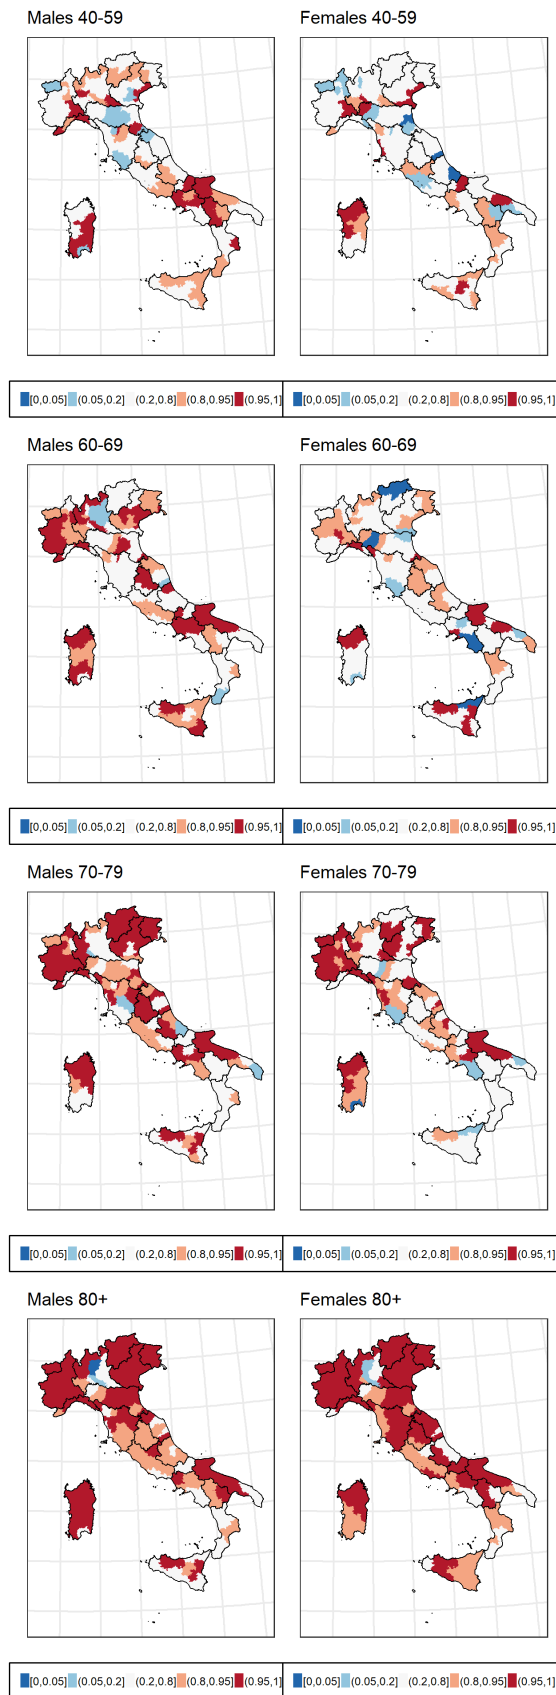



Supplementary Figure 32: Posterior probability that the relative excess mortality is larger than zero during January-June 2020 by NUTS3 regions in Italy stratified by age and sex.

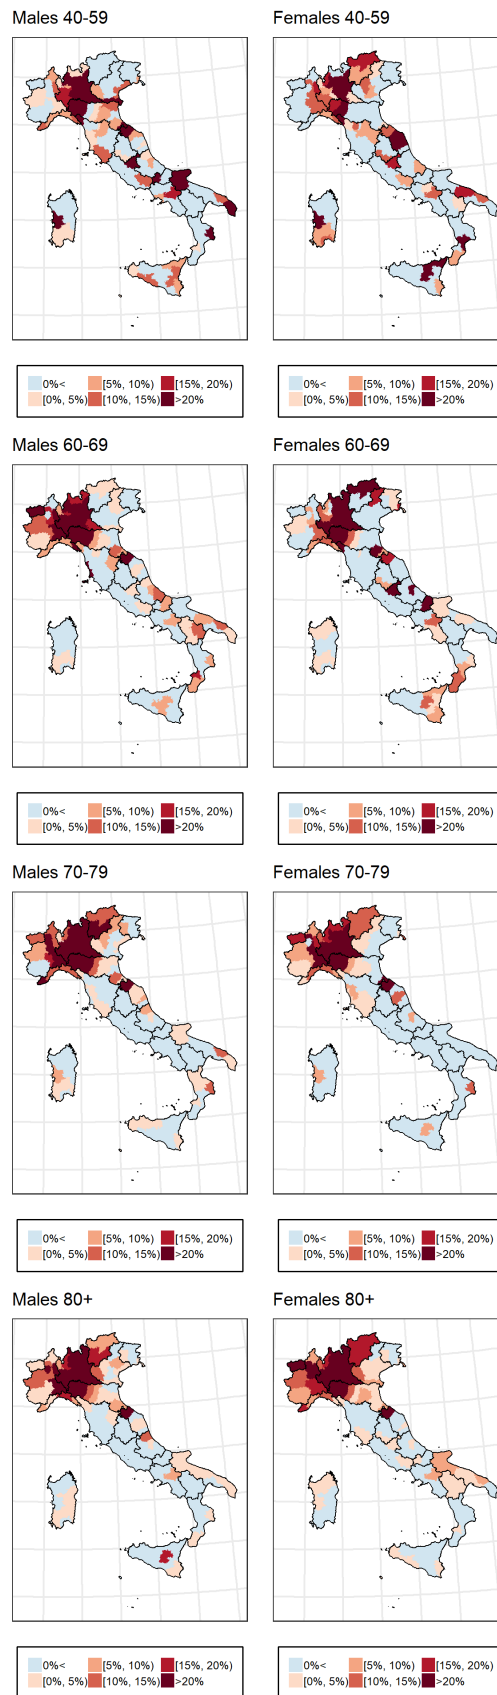

Supplementary Figure 33: Posterior probability that the relative excess mortality is larger than zero during July-December 2020 by NUTS3 regions in Italy stratified by age and sex.

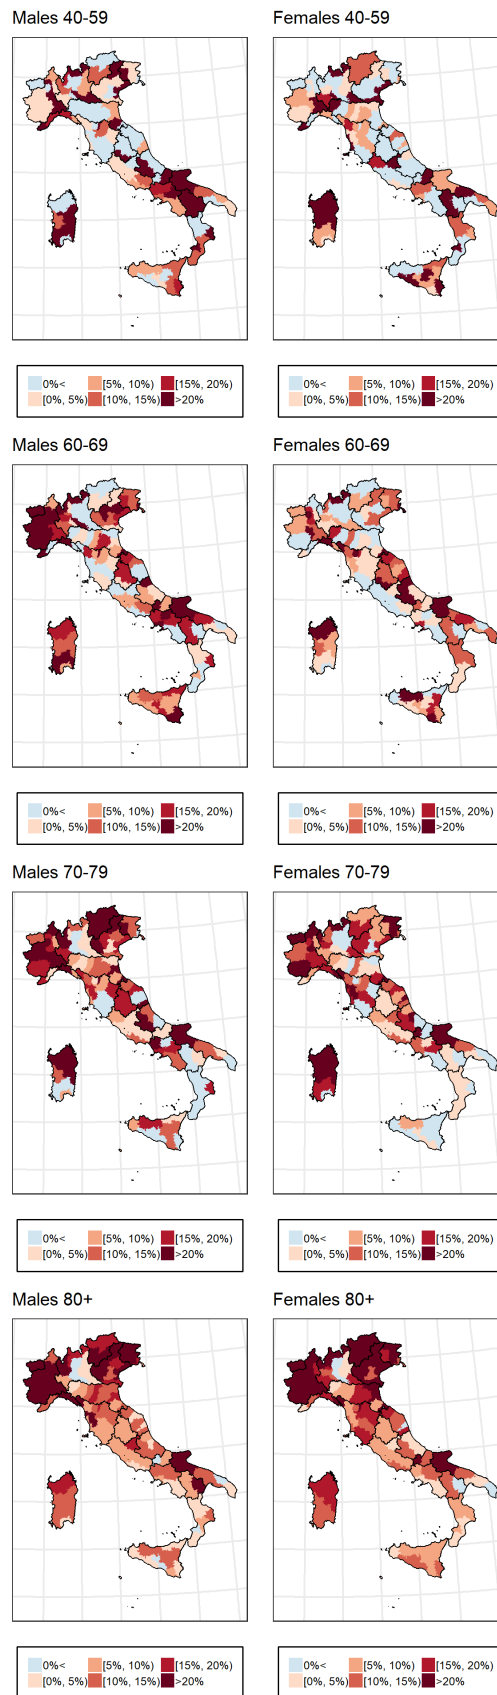

Supplementary Figure 34: Relative excess mortality during January-June 2020 by NUTS3 regions in Spain stratified by age and sex.

Males 40-59

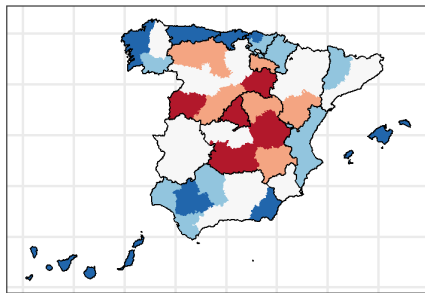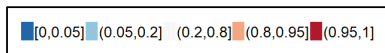

Females 40-59

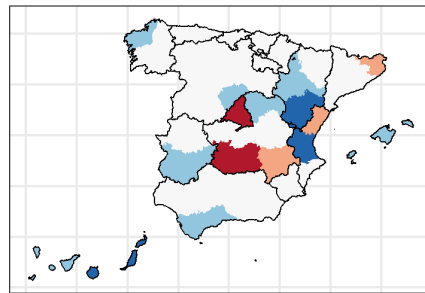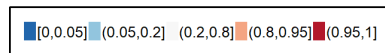

Males 60-69

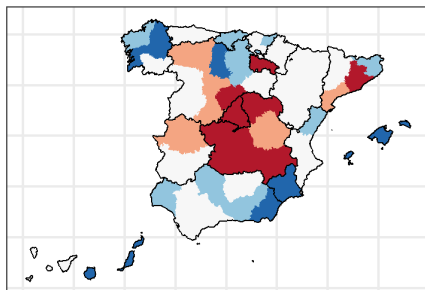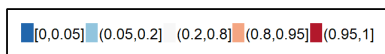

Females 60-69

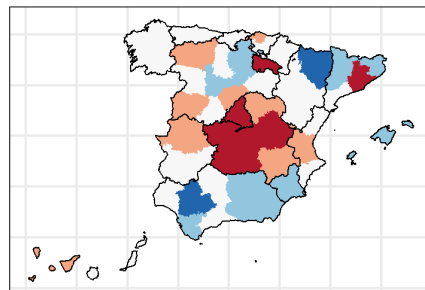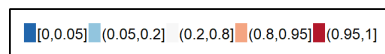

Males 70-79

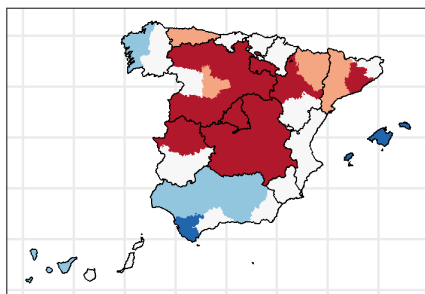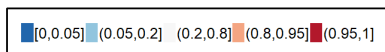

Females 70-79

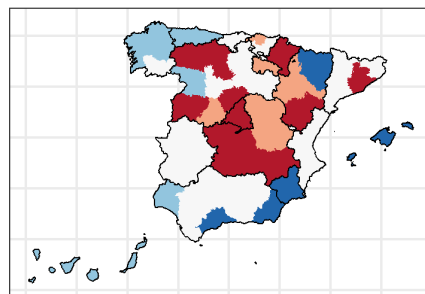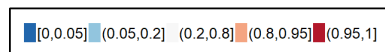

Males 80+

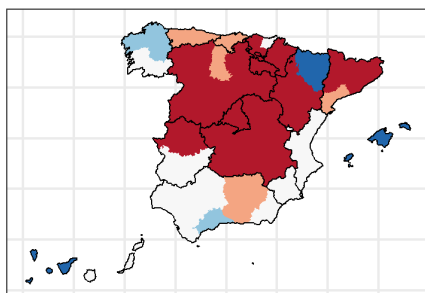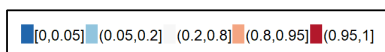

Females 80+

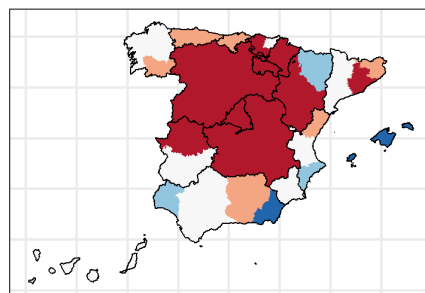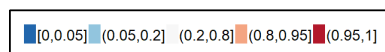

Supplementary Figure 35: Relative excess mortality during July-December 2020 by NUTS3 regions in Spain stratified by age and sex.

Males 40-59

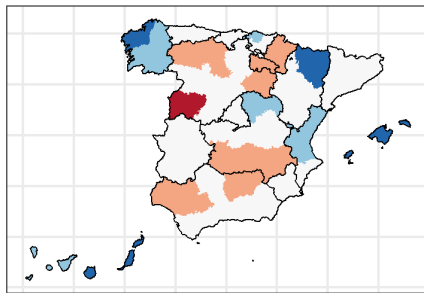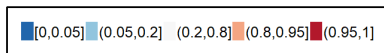

Females 40-59

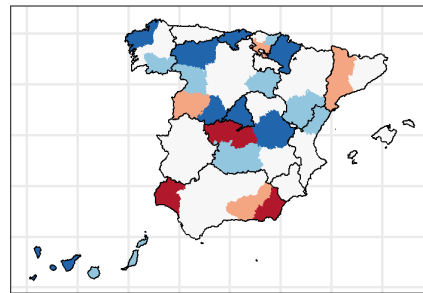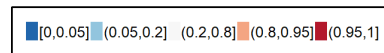

Males 60-69

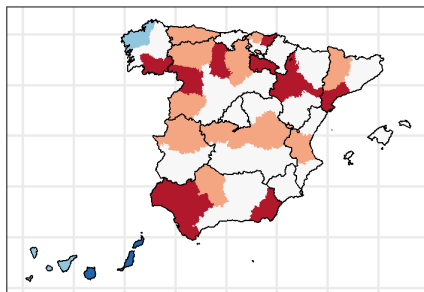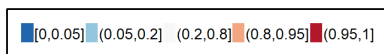

Females 60-69

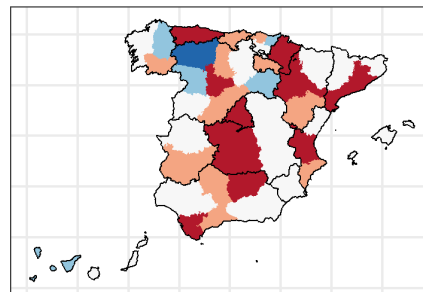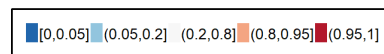

Males 70-79

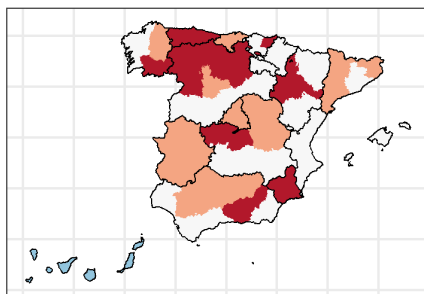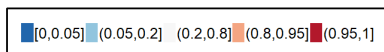

Females 70-79

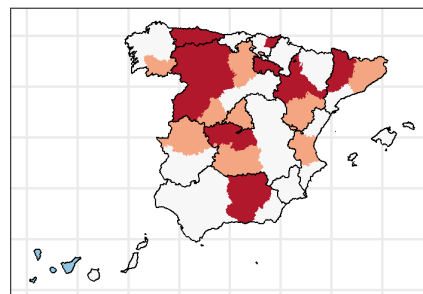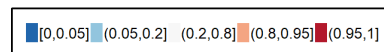

Males 80+

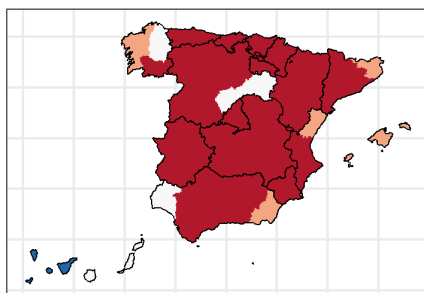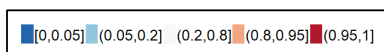

Females 80+

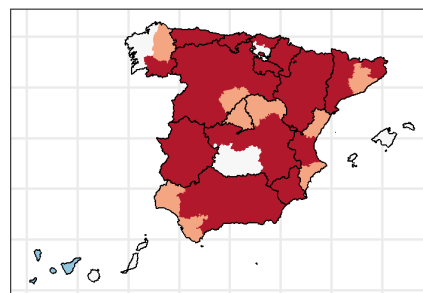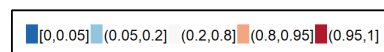

Supplementary Figure 36: Posterior probability that the relative excess mortality is larger than zero during January-June 2020 by NUTS3 regions in Spain stratified by age and sex.

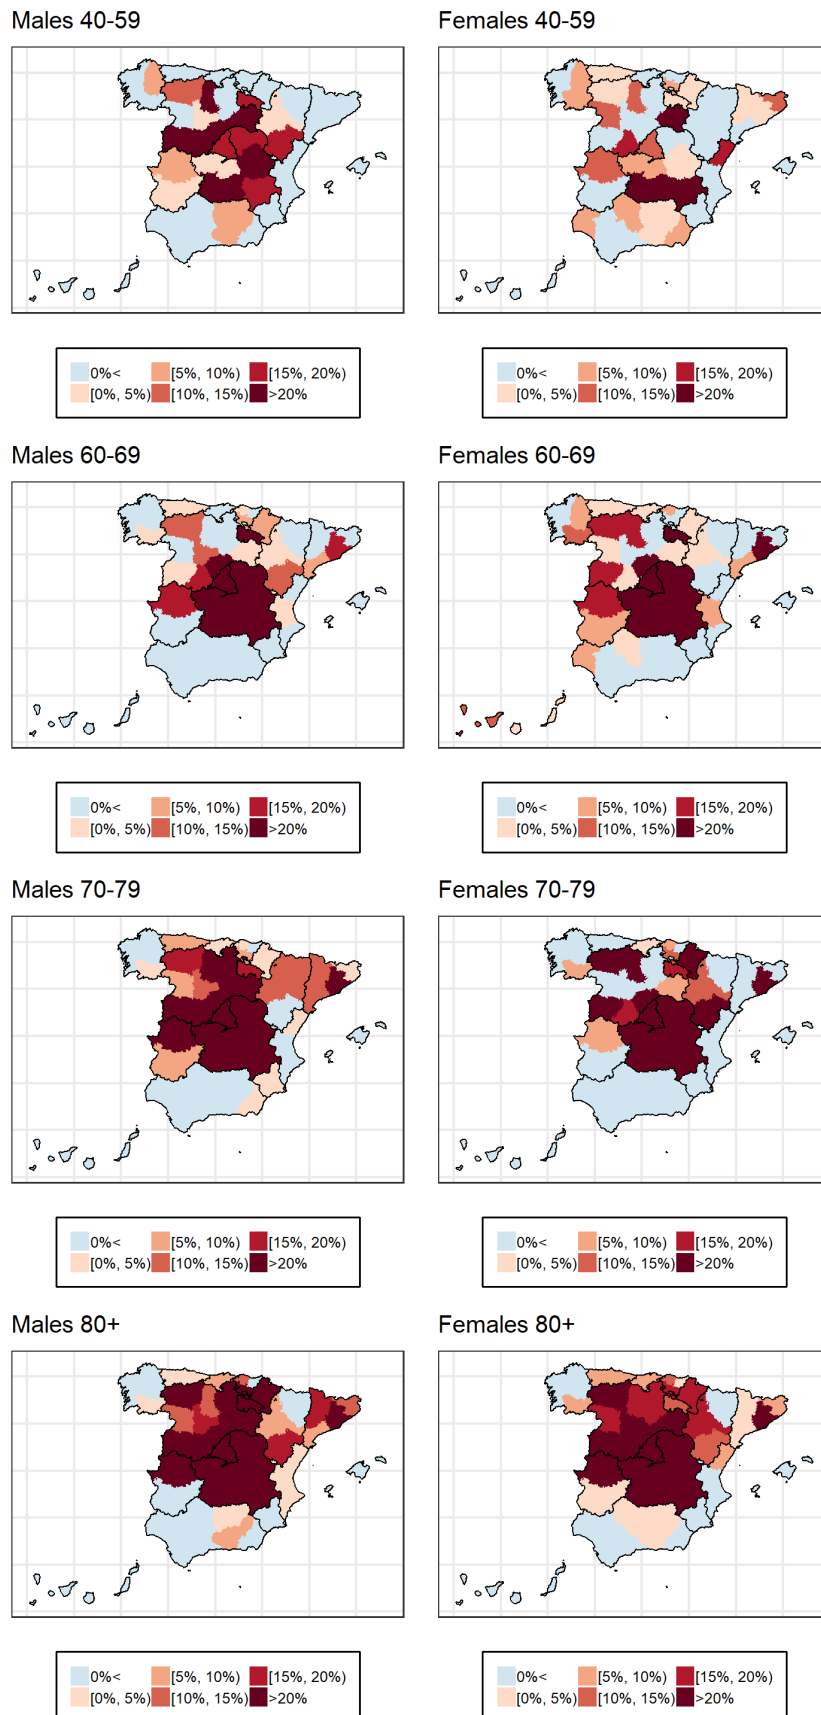

Supplementary Figure 37: Posterior probability that the relative excess mortality is larger than zero during July-December 2020 by NUTS3 regions in Spain stratified by age and sex.

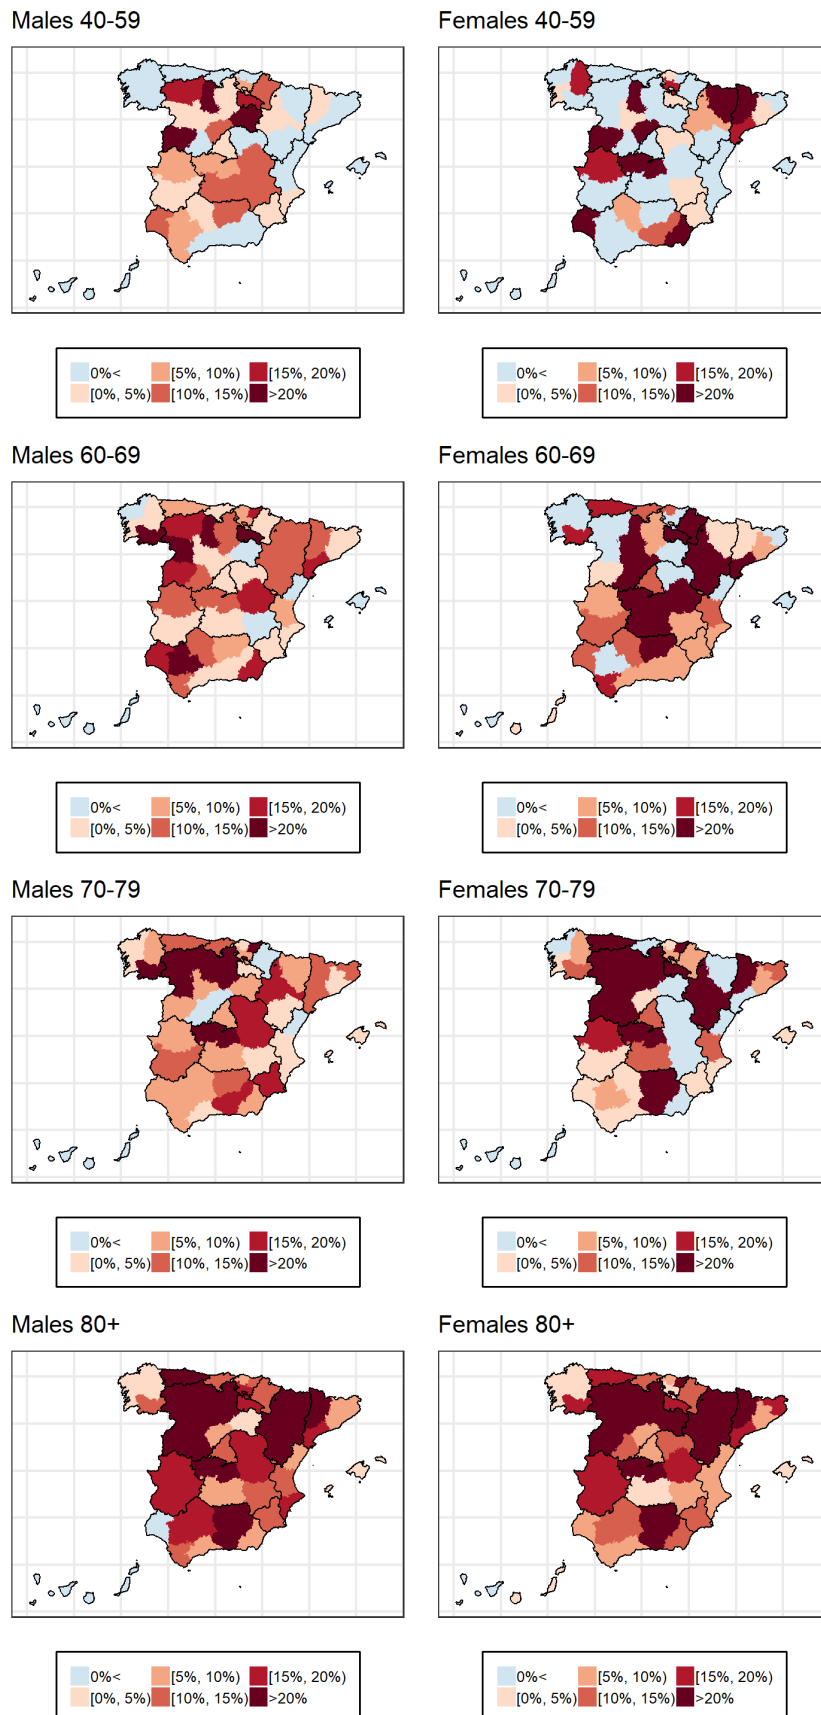

Supplementary Figure 38: Relative excess mortality during January-June 2020 by NUTS3 regions in Switzerland stratified by age and sex.

Males 40-59

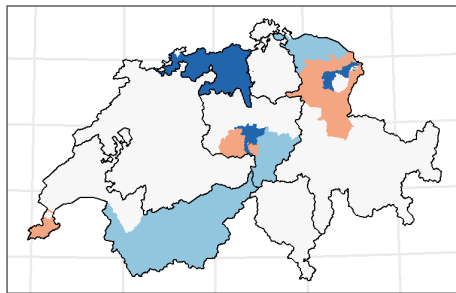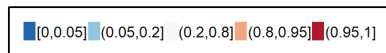

Females 40-59

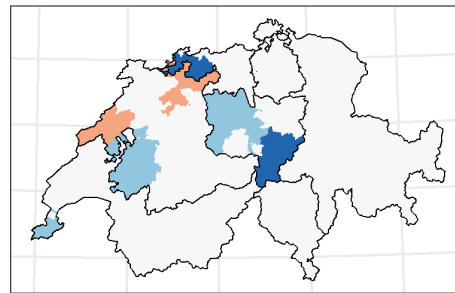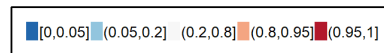

Males 60-69

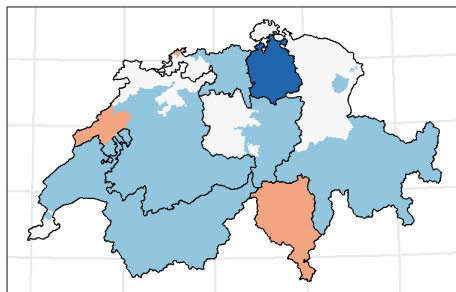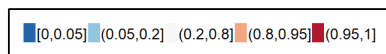

Females 60-69

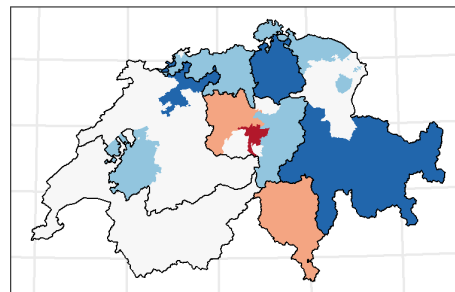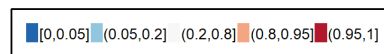

Males 70-79

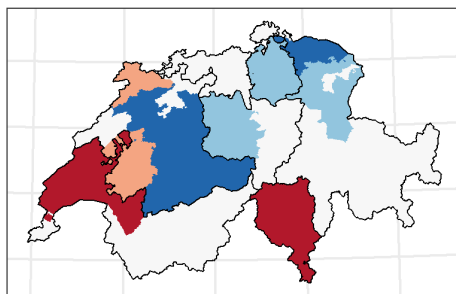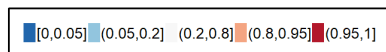

Females 70-79

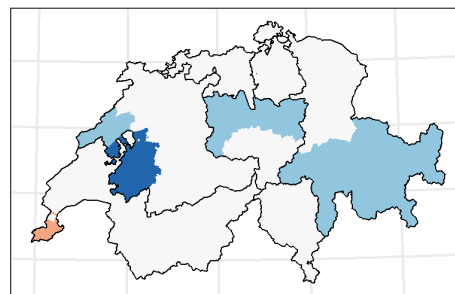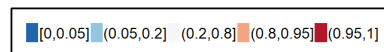

Males 80+

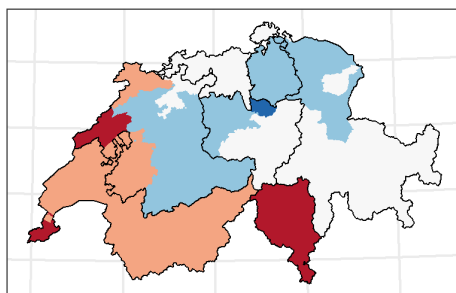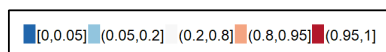

Females 80+

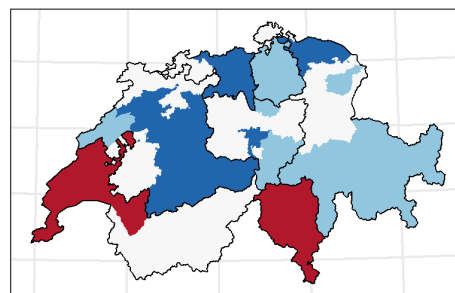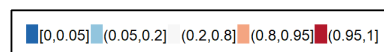

Supplementary Figure 39: Relative excess mortality during July-December 2020 by NUTS3 regions in Switzerland stratified by age and sex.

Males 40-59

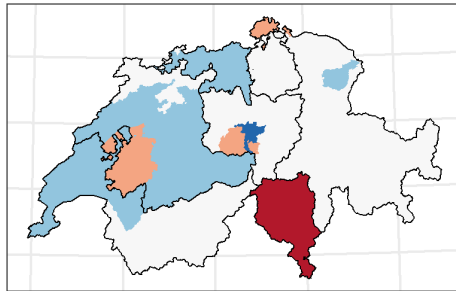

Females 40-59

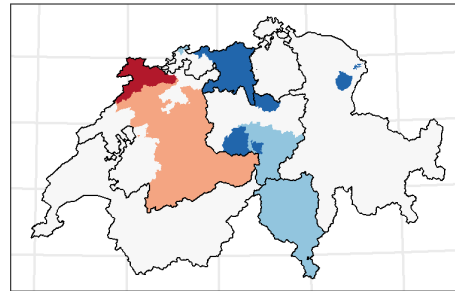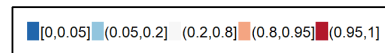

Males 60-69

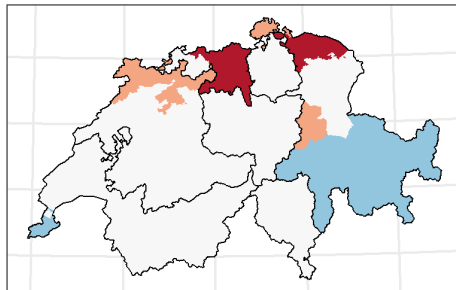

Females 60-69

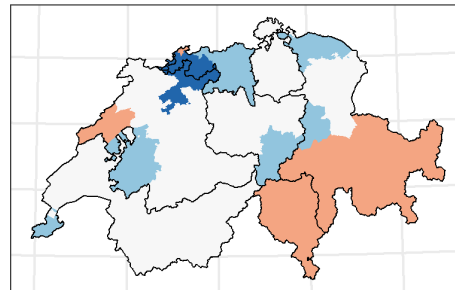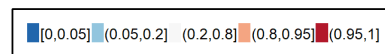

Males 70-79

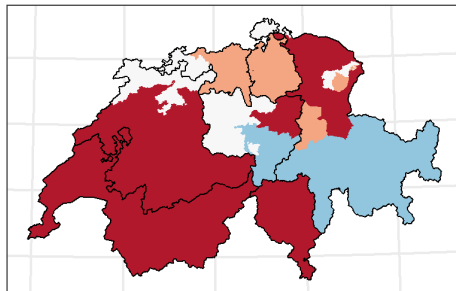

Females 70-79

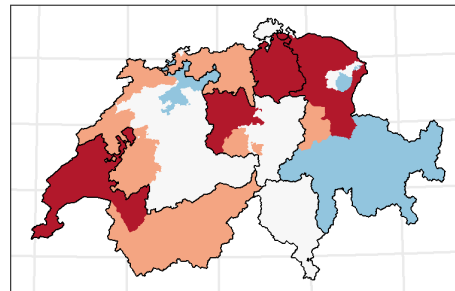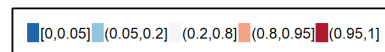

Males 80+

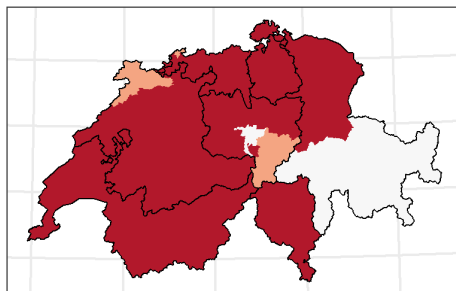

Females 80+

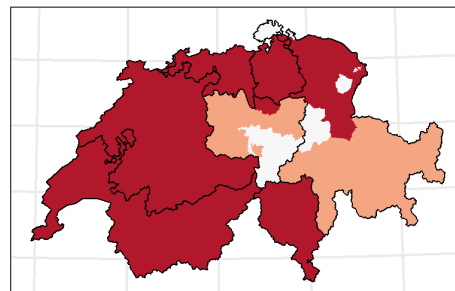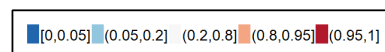



Supplementary Figure 40: Posterior probability that the relative excess mortality is larger than zero during January-June 2020 by NUTS3 regions in Switzerland stratified by age and sex.

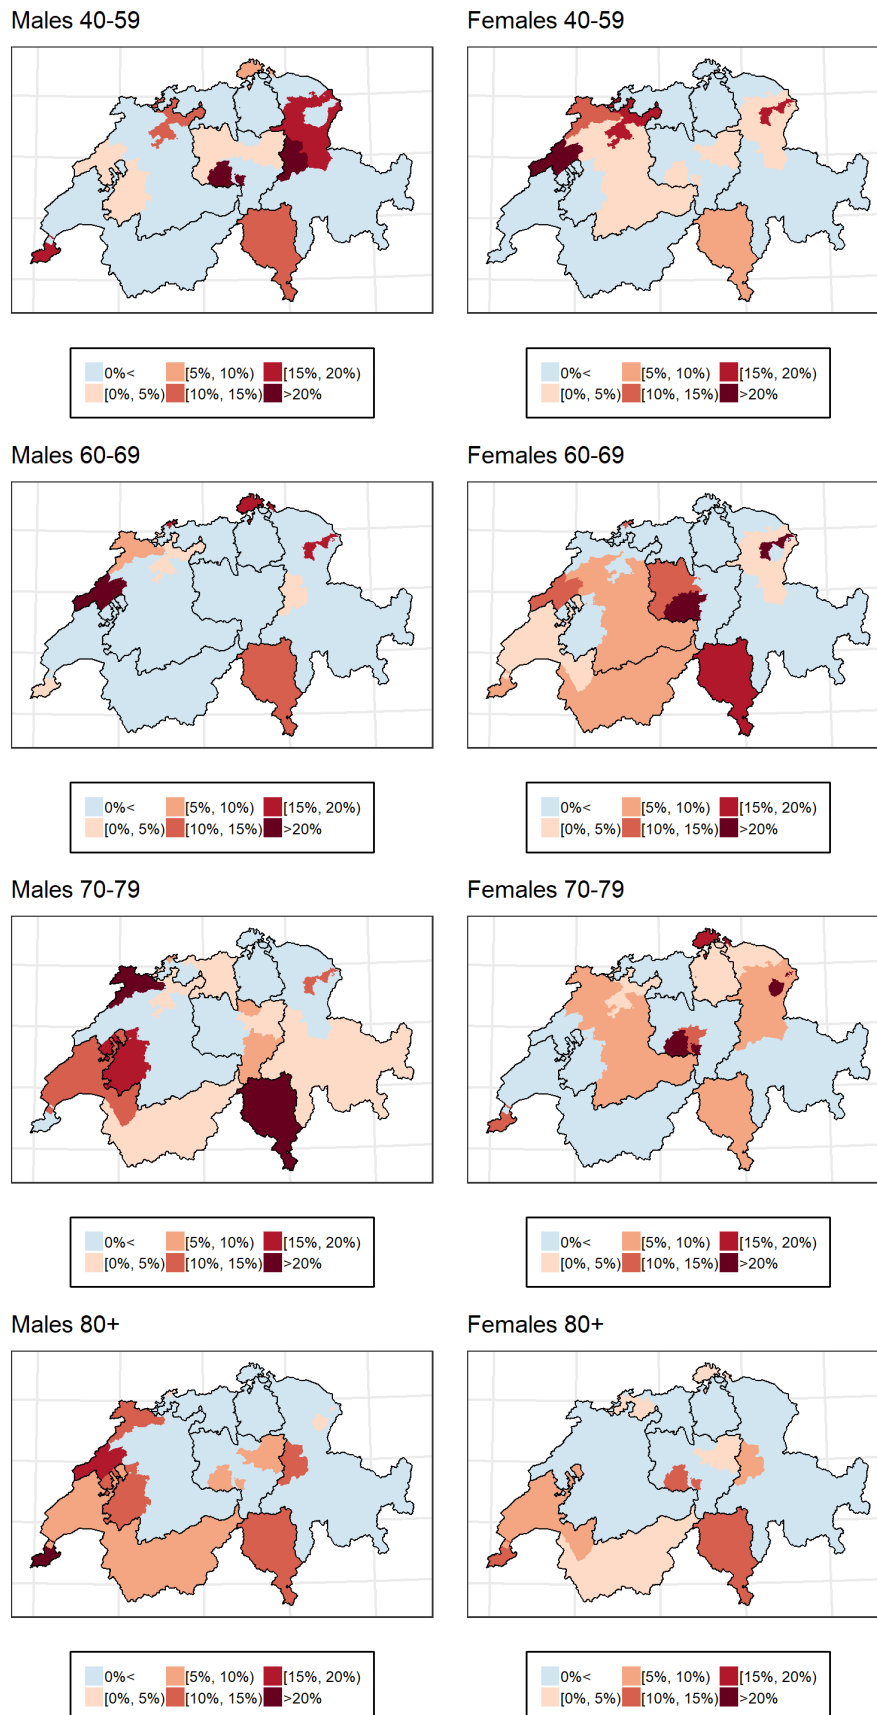

Supplementary Figure 41: Posterior probability that the relative excess mortality is larger than zero during July-December 2020 by NUTS3 regions in Switzerland stratified by age and sex.

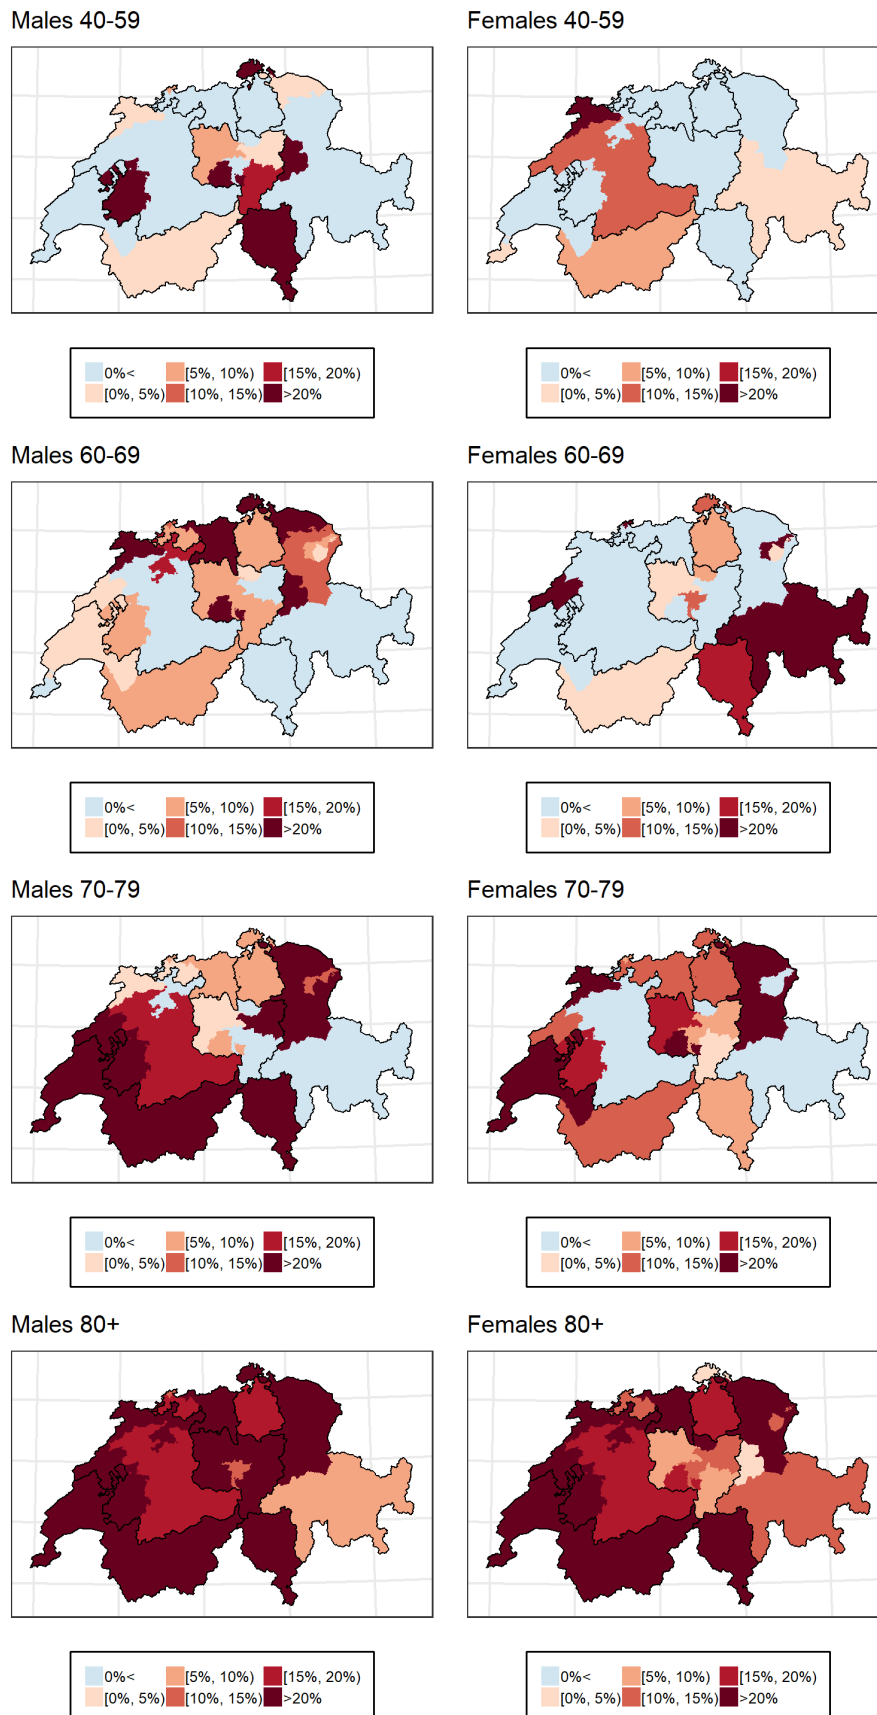

Supplement: 41467_2022_28157_MOESM1_ESM.pdf [file 41467_2022_28157_MOESM1_ESM.pdf]
